# Supplementary material for: TRPC5 ion channel permeation promotes weight gain in hypercholesterolaemic mice
Source: PubMed Central journal article supplement (PMC6349875; doi:10.1038/s41598-018-37299-8), 2019-01-28
Supplement: 41598_2018_37299_MOESM1_ESM.pdf [file 41598_2018_37299_MOESM1_ESM.pdf]

## **SUPPLEMENTARY INFORMATION**

**ARTICLE TITLE:** TRPC5 ion channel permeation promotes weight gain in hypercholesterolaemic mice

**AUTHORS:** Baptiste Rode PhD, Nadira Y Yuldasheva PhD, Paul D Baxter PhD, Alicia Sedo BSc, Justin F Ainscough PhD, Michael Shires BSc, Mark T Kearney MD, Marc A Bailey MD, Stephen B Wheatcroft MD and David J Beech PhD\*

\* Corresponding author: Professor David J Beech, Leeds Institute of Cardiovascular and Metabolic Medicine, LIGHT Building, Clarendon Way, School of Medicine, University of Leeds, Leeds LS2 9JT, UK. E-mail [d.j.beech@leeds.ac.uk](mailto:d.j.beech@leeds.ac.uk). Telephone +44 (0) 113 3434323.

**AUTHOR AFFILIATION:** School of Medicine, University of Leeds, Leeds, LS2 9JT, UK

**Supplementary File 1. Full-length gels from Figure 1C.**

**Supplementary File 2. Detailed values for each genotype.**

**Supplementary File 3. Raw data for each parameter analysed.**

**Supplementary File 4. Detailed statistical analysis.**

## **SUPPLEMENTARY INFORMATION LEGEND**

**Supplementary File 1. Full-length gels from Figure 1C.** Gel-electrophoresis of end-point RT-PCR performed on epididymal fat pad (left) and liver (right). Results are shown without (-) and with (+) reverse transcription (RT). RT+ reactions were loaded in duplicates for epididymal fat pad. The sizes of the DNA markers (New England Biolabs 100bp ladder) are indicated on the left in base-pairs. The arrows point to the expected PCR product sizes. DNT5 mRNA was detected in tissues from DOX-treated double transgenic mice but not Controls.

**Supplementary File 2. Detailed values for each genotype.** Individual values for each genotype is shown for each parameter of the present study. Mean value is shown with a horizontal bar. The genotype of each group is indicated in italic on the bottom of each scatter plot: “*DNT5*” refers to the transgene carrying the DNT5 coding sequence under the control of the Tetracycline Response Element, “*rtTA*” refers to the transgene allowing the expression of the rtTA transactivator from the ROSA26 locus. Absence and presence of each transgene are denoted by “-” and “+”, respectively. The corresponding groups are indicated underneath.

Supplementary File 1

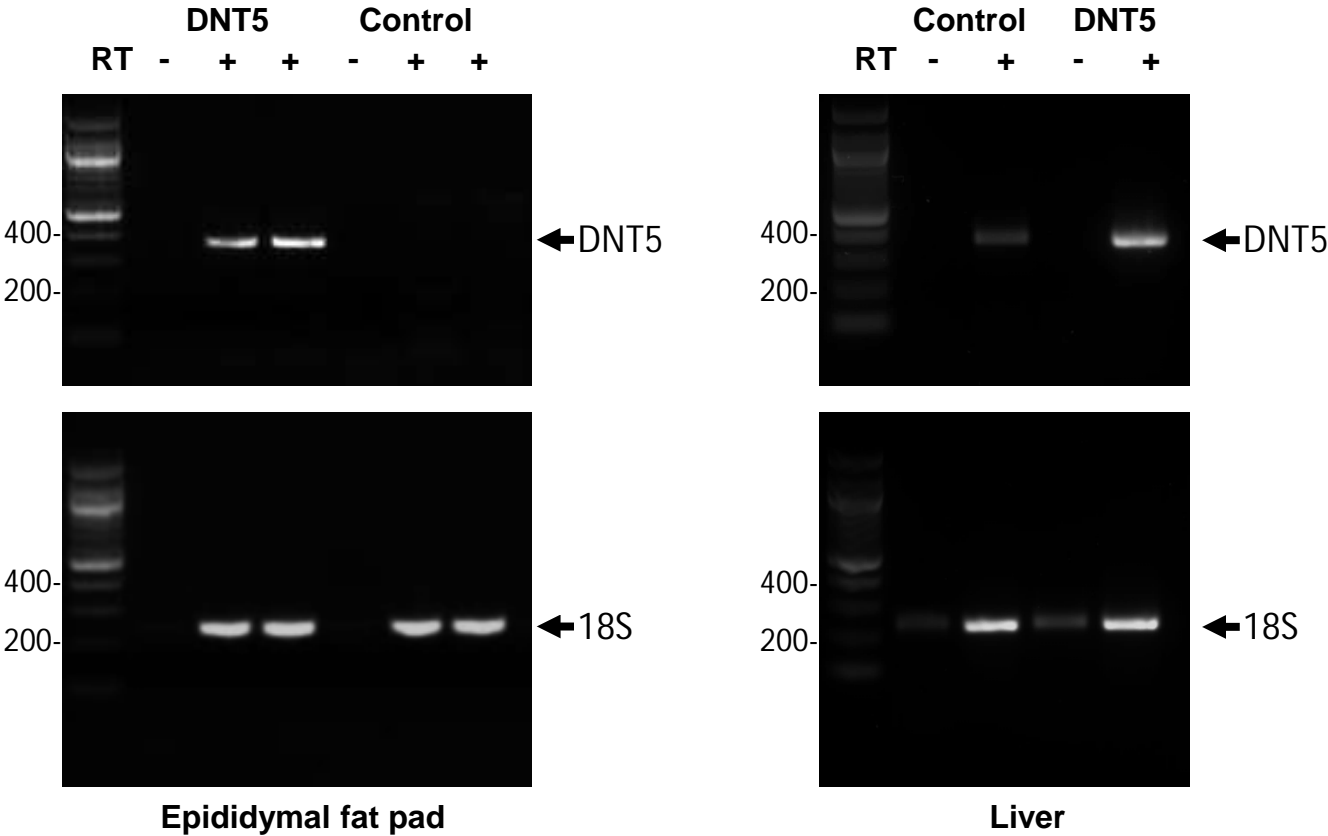

Supplementary File 2 (Part1/2)

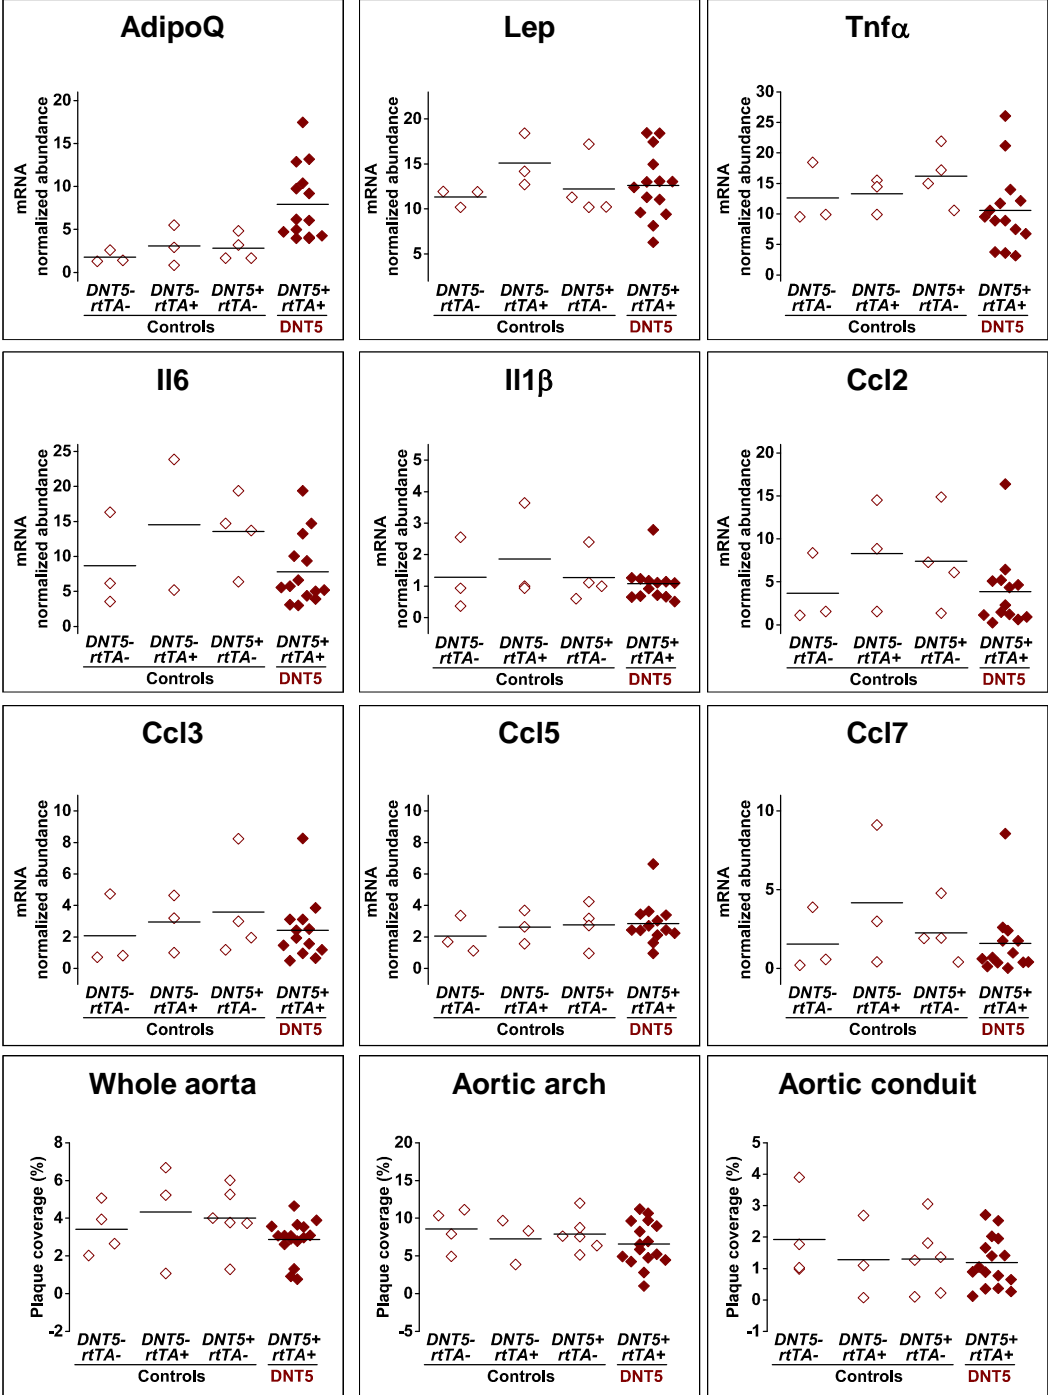

Supplementary File 2 (Part2/2)

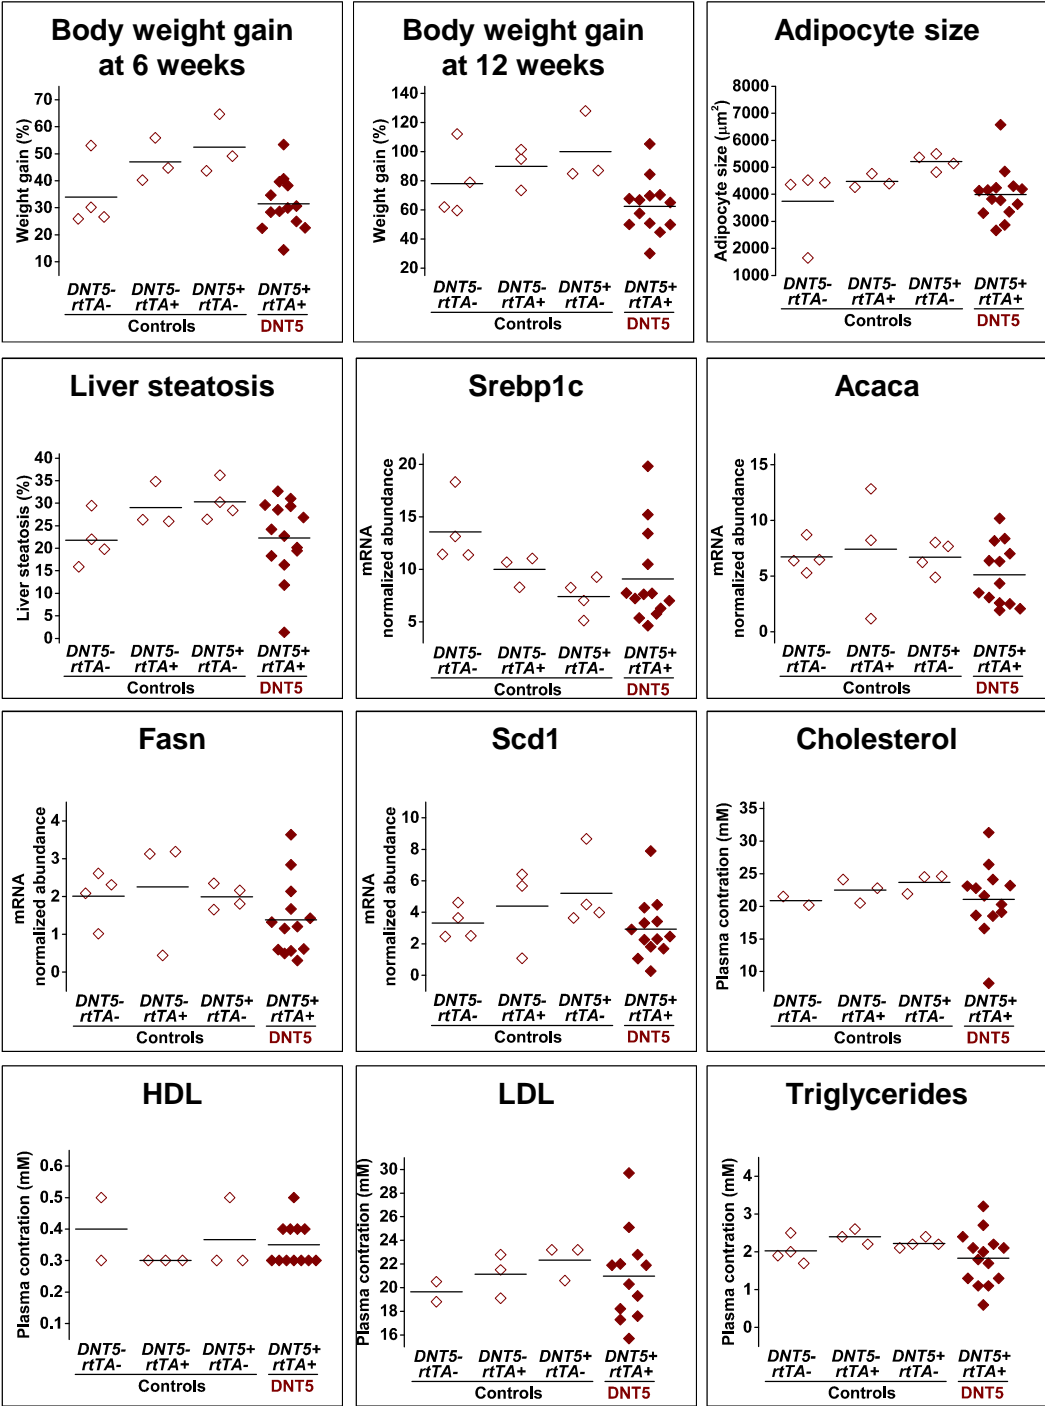

### Supplementary File 3

| ID  | GENOTYPE    | GROUP | CAGE | Adipose tissue Adiponectin mRNA relative abundance |
|-----|-------------|-------|------|----------------------------------------------------|
| 49  | DNT5+/rtTA- | CT    | 1    |                                                    |
| 50  | DNT5+/rtTA+ | DN    | 1    |                                                    |
| 51  | DNT5+/rtTA- | CT    | 2    |                                                    |
| 52  | DNT5+/rtTA+ | DN    | 2    |                                                    |
| 112 | DNT5+/rtTA+ | DN    | 4    | 4.0                                                |
| 113 | DNT5+/rtTA- | CT    | 4    | 1.7                                                |
| 118 | DNT5+/rtTA+ | DN    | 5    | 4.1                                                |
| 119 | DNT5-/rtTA+ | CT    | 5    | 2.9                                                |
| 120 | DNT5+/rtTA+ | DN    | 5    | 5.0                                                |
| 121 | DNT5+/rtTA+ | DN    | 6    | 4.0                                                |
| 122 | DNT5-/rtTA- | CT    | 6    | 2.6                                                |
| 123 | DNT5+/rtTA+ | DN    | 6    | 4.3                                                |
| 124 | DNT5+/rtTA+ | DN    | 7    | 6.0                                                |
| 125 | DNT5+/rtTA- | CT    | 7    | 3.2                                                |
| 126 | DNT5+/rtTA- | CT    | 7    | 4.8                                                |
| 127 | DNT5+/rtTA+ | DN    | 7    | 13.2                                               |
| 128 | DNT5+/rtTA+ | DN    | 8    | 4.7                                                |
| 129 | DNT5+/rtTA+ | DN    | 8    | 12.9                                               |
| 130 | DNT5-/rtTA+ | CT    | 8    | 5.5                                                |
| 134 | DNT5+/rtTA- | CT    | 10   | 1.7                                                |
| 135 | DNT5+/rtTA+ | DN    | 10   | 10.4                                               |
| 136 | DNT5+/rtTA+ | DN    | 10   | 17.5                                               |
| 137 | DNT5+/rtTA+ | DN    | 11   | 9.2                                                |
| 138 | DNT5-/rtTA- | CT    | 11   |                                                    |
| 139 | DNT5-/rtTA- | CT    | 11   | 1.4                                                |
| 140 | DNT5+/rtTA+ | DN    | 12   | 6.2                                                |
| 141 | DNT5-/rtTA+ | CT    | 12   | 0.8                                                |
| 142 | DNT5-/rtTA- | CT    | 12   | 1.3                                                |
| 143 | DNT5+/rtTA+ | DN    | 12   | 9.7                                                |

| ID  | GENOTYPE    | GROUP | CAGE | Adipose tissue Leptin<br>mRNA relative abundance |
|-----|-------------|-------|------|--------------------------------------------------|
| 49  | DNT5+/rtTA- | CT    | 1    |                                                  |
| 50  | DNT5+/rtTA+ | DN    | 1    |                                                  |
| 51  | DNT5+/rtTA- | CT    | 2    |                                                  |
| 52  | DNT5+/rtTA+ | DN    | 2    |                                                  |
| 112 | DNT5+/rtTA+ | DN    | 4    | 11.0                                             |
| 113 | DNT5+/rtTA- | CT    | 4    | 10.2                                             |
| 118 | DNT5+/rtTA+ | DN    | 5    | 11.3                                             |
| 119 | DNT5-/rtTA+ | CT    | 5    | 14.2                                             |
| 120 | DNT5+/rtTA+ | DN    | 5    | 18.4                                             |
| 121 | DNT5+/rtTA+ | DN    | 6    | 18.4                                             |
| 122 | DNT5-/rtTA- | CT    | 6    | 10.2                                             |
| 123 | DNT5+/rtTA+ | DN    | 6    | 8.1                                              |
| 124 | DNT5+/rtTA+ | DN    | 7    | 9.6                                              |
| 125 | DNT5+/rtTA- | CT    | 7    | 17.2                                             |
| 126 | DNT5+/rtTA- | CT    | 7    | 11.3                                             |
| 127 | DNT5+/rtTA+ | DN    | 7    | 17.4                                             |
| 128 | DNT5+/rtTA+ | DN    | 8    | 13.1                                             |
| 129 | DNT5+/rtTA+ | DN    | 8    | 15.0                                             |
| 130 | DNT5-/rtTA+ | CT    | 8    | 12.7                                             |
| 134 | DNT5+/rtTA- | CT    | 10   | 10.2                                             |
| 135 | DNT5+/rtTA+ | DN    | 10   | 9.4                                              |
| 136 | DNT5+/rtTA+ | DN    | 10   | 6.3                                              |
| 137 | DNT5+/rtTA+ | DN    | 11   | 13.0                                             |
| 138 | DNT5-/rtTA- | CT    | 11   |                                                  |
| 139 | DNT5-/rtTA- | CT    | 11   | 11.9                                             |
| 140 | DNT5+/rtTA+ | DN    | 12   | 13.0                                             |
| 141 | DNT5-/rtTA+ | CT    | 12   | 18.4                                             |
| 142 | DNT5-/rtTA- | CT    | 12   | 11.9                                             |
| 143 | DNT5+/rtTA+ | DN    | 12   | 12.4                                             |

| ID  | GENOTYPE    | GROUP | CAGE | Adipose tissue TNF $\alpha$ mRNA<br>relative abundance |
|-----|-------------|-------|------|--------------------------------------------------------|
| 49  | DNT5+/rtTA- | CT    | 1    |                                                        |
| 50  | DNT5+/rtTA+ | DN    | 1    |                                                        |
| 51  | DNT5+/rtTA- | CT    | 2    |                                                        |
| 52  | DNT5+/rtTA+ | DN    | 2    |                                                        |
| 112 | DNT5+/rtTA+ | DN    | 4    | 8.9                                                    |
| 113 | DNT5+/rtTA- | CT    | 4    | 10.6                                                   |
| 118 | DNT5+/rtTA+ | DN    | 5    | 8.9                                                    |
| 119 | DNT5-/rtTA+ | CT    | 5    | 15.5                                                   |
| 120 | DNT5+/rtTA+ | DN    | 5    | 21.2                                                   |
| 121 | DNT5+/rtTA+ | DN    | 6    | 14.0                                                   |
| 122 | DNT5-/rtTA- | CT    | 6    | 18.4                                                   |
| 123 | DNT5+/rtTA+ | DN    | 6    | 7.5                                                    |
| 124 | DNT5+/rtTA+ | DN    | 7    | 3.6                                                    |
| 125 | DNT5+/rtTA- | CT    | 7    | 21.9                                                   |
| 126 | DNT5+/rtTA- | CT    | 7    | 15.0                                                   |
| 127 | DNT5+/rtTA+ | DN    | 7    | 11.7                                                   |
| 128 | DNT5+/rtTA+ | DN    | 8    | 26.1                                                   |
| 129 | DNT5+/rtTA+ | DN    | 8    | 12.2                                                   |
| 130 | DNT5-/rtTA+ | CT    | 8    | 14.5                                                   |
| 134 | DNT5+/rtTA- | CT    | 10   | 17.2                                                   |
| 135 | DNT5+/rtTA+ | DN    | 10   | 9.5                                                    |
| 136 | DNT5+/rtTA+ | DN    | 10   | 6.7                                                    |
| 137 | DNT5+/rtTA+ | DN    | 11   | 3.7                                                    |
| 138 | DNT5-/rtTA- | CT    | 11   |                                                        |
| 139 | DNT5-/rtTA- | CT    | 11   | 9.9                                                    |
| 140 | DNT5+/rtTA+ | DN    | 12   | 10.6                                                   |
| 141 | DNT5-/rtTA+ | CT    | 12   | 9.9                                                    |
| 142 | DNT5-/rtTA- | CT    | 12   | 9.5                                                    |
| 143 | DNT5+/rtTA+ | DN    | 12   | 3.1                                                    |



| <b>ID</b> | <b>GENOTYPE</b> | <b>GROUP</b> | <b>CAGE</b> | <b>Adipose tissue Il6 mRNA<br/>relative abundance</b> |
|-----------|-----------------|--------------|-------------|-------------------------------------------------------|
| 49        | DNT5+/rtTA-     | CT           | 1           |                                                       |
| 50        | DNT5+/rtTA+     | DN           | 1           |                                                       |
| 51        | DNT5+/rtTA-     | CT           | 2           |                                                       |
| 52        | DNT5+/rtTA+     | DN           | 2           |                                                       |
| 112       | DNT5+/rtTA+     | DN           | 4           | 9.4                                                   |
| 113       | DNT5+/rtTA-     | CT           | 4           | 13.7                                                  |
| 118       | DNT5+/rtTA+     | DN           | 5           | 13.2                                                  |
| 119       | DNT5-/rtTA+     | CT           | 5           | 23.8                                                  |
| 120       | DNT5+/rtTA+     | DN           | 5           | 19.4                                                  |
| 121       | DNT5+/rtTA+     | DN           | 6           | 10.0                                                  |
| 122       | DNT5-/rtTA-     | CT           | 6           | 16.3                                                  |
| 123       | DNT5+/rtTA+     | DN           | 6           | 4.4                                                   |
| 124       | DNT5+/rtTA+     | DN           | 7           | 3.0                                                   |
| 125       | DNT5+/rtTA-     | CT           | 7           | 19.4                                                  |
| 126       | DNT5+/rtTA-     | CT           | 7           | 14.7                                                  |
| 127       | DNT5+/rtTA+     | DN           | 7           | 6.6                                                   |
| 128       | DNT5+/rtTA+     | DN           | 8           | 14.7                                                  |
| 129       | DNT5+/rtTA+     | DN           | 8           | 5.0                                                   |
| 130       | DNT5-/rtTA+     | CT           | 8           | 5.2                                                   |
| 134       | DNT5+/rtTA-     | CT           | 10          | 6.4                                                   |
| 135       | DNT5+/rtTA+     | DN           | 10          | 5.8                                                   |
| 136       | DNT5+/rtTA+     | DN           | 10          | 5.2                                                   |
| 137       | DNT5+/rtTA+     | DN           | 11          | 3.9                                                   |
| 138       | DNT5-/rtTA-     | CT           | 11          |                                                       |
| 139       | DNT5-/rtTA-     | CT           | 11          | 6.2                                                   |
| 140       | DNT5+/rtTA+     | DN           | 12          | 5.6                                                   |
| 141       | DNT5-/rtTA+     | CT           | 12          |                                                       |
| 142       | DNT5-/rtTA-     | CT           | 12          | 3.5                                                   |
| 143       | DNT5+/rtTA+     | DN           | 12          | 3.1                                                   |

| ID  | GENOTYPE    | GROUP | CAGE | Adipose tissue Il1b mRNA<br>relative abundance |
|-----|-------------|-------|------|------------------------------------------------|
| 49  | DNT5+/rtTA- | CT    | 1    |                                                |
| 50  | DNT5+/rtTA+ | DN    | 1    |                                                |
| 51  | DNT5+/rtTA- | CT    | 2    |                                                |
| 52  | DNT5+/rtTA+ | DN    | 2    |                                                |
| 112 | DNT5+/rtTA+ | DN    | 4    | 1.11                                           |
| 113 | DNT5+/rtTA- | CT    | 4    | 1.11                                           |
| 118 | DNT5+/rtTA+ | DN    | 5    | 0.71                                           |
| 119 | DNT5-/rtTA+ | CT    | 5    | 3.64                                           |
| 120 | DNT5+/rtTA+ | DN    | 5    | 1.17                                           |
| 121 | DNT5+/rtTA+ | DN    | 6    | 0.92                                           |
| 122 | DNT5-/rtTA- | CT    | 6    | 2.55                                           |
| 123 | DNT5+/rtTA+ | DN    | 6    | 1.15                                           |
| 124 | DNT5+/rtTA+ | DN    | 7    | 0.67                                           |
| 125 | DNT5+/rtTA- | CT    | 7    | 2.40                                           |
| 126 | DNT5+/rtTA- | CT    | 7    | 1.00                                           |
| 127 | DNT5+/rtTA+ | DN    | 7    | 1.23                                           |
| 128 | DNT5+/rtTA+ | DN    | 8    | 2.79                                           |
| 129 | DNT5+/rtTA+ | DN    | 8    | 1.10                                           |
| 130 | DNT5-/rtTA+ | CT    | 8    | 1.00                                           |
| 134 | DNT5+/rtTA- | CT    | 10   | 0.60                                           |
| 135 | DNT5+/rtTA+ | DN    | 10   | 0.68                                           |
| 136 | DNT5+/rtTA+ | DN    | 10   | 1.27                                           |
| 137 | DNT5+/rtTA+ | DN    | 11   | 0.51                                           |
| 138 | DNT5-/rtTA- | CT    | 11   |                                                |
| 139 | DNT5-/rtTA- | CT    | 11   | 0.37                                           |
| 140 | DNT5+/rtTA+ | DN    | 12   | 0.66                                           |
| 141 | DNT5-/rtTA+ | CT    | 12   | 0.94                                           |
| 142 | DNT5-/rtTA- | CT    | 12   | 0.93                                           |
| 143 | DNT5+/rtTA+ | DN    | 12   |                                                |

| ID  | GENOTYPE    | GROUP | CAGE | Adipose tissue Ccl2 mRNA<br>relative abundance |
|-----|-------------|-------|------|------------------------------------------------|
| 49  | DNT5+/rtTA- | CT    | 1    |                                                |
| 50  | DNT5+/rtTA+ | DN    | 1    |                                                |
| 51  | DNT5+/rtTA- | CT    | 2    |                                                |
| 52  | DNT5+/rtTA+ | DN    | 2    |                                                |
| 112 | DNT5+/rtTA+ | DN    | 4    | 4.35                                           |
| 113 | DNT5+/rtTA- | CT    | 4    | 6.10                                           |
| 118 | DNT5+/rtTA+ | DN    | 5    | 5.21                                           |
| 119 | DNT5-/rtTA+ | CT    | 5    | 14.50                                          |
| 120 | DNT5+/rtTA+ | DN    | 5    | 6.43                                           |
| 121 | DNT5+/rtTA+ | DN    | 6    | 4.65                                           |
| 122 | DNT5-/rtTA- | CT    | 6    | 8.37                                           |
| 123 | DNT5+/rtTA+ | DN    | 6    | 2.29                                           |
| 124 | DNT5+/rtTA+ | DN    | 7    | 1.21                                           |
| 125 | DNT5+/rtTA- | CT    | 7    | 14.87                                          |
| 126 | DNT5+/rtTA- | CT    | 7    | 7.29                                           |
| 127 | DNT5+/rtTA+ | DN    | 7    | 5.10                                           |
| 128 | DNT5+/rtTA+ | DN    | 8    | 16.37                                          |
| 129 | DNT5+/rtTA+ | DN    | 8    | 1.46                                           |
| 130 | DNT5-/rtTA+ | CT    | 8    | 8.85                                           |
| 134 | DNT5+/rtTA- | CT    | 10   | 1.35                                           |
| 135 | DNT5+/rtTA+ | DN    | 10   | 0.61                                           |
| 136 | DNT5+/rtTA+ | DN    | 10   | 0.26                                           |
| 137 | DNT5+/rtTA+ | DN    | 11   | 0.91                                           |
| 138 | DNT5-/rtTA- | CT    | 11   |                                                |
| 139 | DNT5-/rtTA- | CT    | 11   | 1.54                                           |
| 140 | DNT5+/rtTA+ | DN    | 12   | 1.15                                           |
| 141 | DNT5-/rtTA+ | CT    | 12   | 1.54                                           |
| 142 | DNT5-/rtTA- | CT    | 12   | 1.09                                           |
| 143 | DNT5+/rtTA+ | DN    | 12   |                                                |

| ID  | GENOTYPE    | GROUP | CAGE | Adipose tissue Ccl3 mRNA<br>relative abundance |
|-----|-------------|-------|------|------------------------------------------------|
| 49  | DNT5+/rtTA- | CT    | 1    |                                                |
| 50  | DNT5+/rtTA+ | DN    | 1    |                                                |
| 51  | DNT5+/rtTA- | CT    | 2    |                                                |
| 52  | DNT5+/rtTA+ | DN    | 2    |                                                |
| 112 | DNT5+/rtTA+ | DN    | 4    | 2.50                                           |
| 113 | DNT5+/rtTA- | CT    | 4    | 1.95                                           |
| 118 | DNT5+/rtTA+ | DN    | 5    | 1.57                                           |
| 119 | DNT5-/rtTA+ | CT    | 5    | 4.64                                           |
| 120 | DNT5+/rtTA+ | DN    | 5    | 3.11                                           |
| 121 | DNT5+/rtTA+ | DN    | 6    | 3.11                                           |
| 122 | DNT5-/rtTA- | CT    | 6    | 4.73                                           |
| 123 | DNT5+/rtTA+ | DN    | 6    | 1.93                                           |
| 124 | DNT5+/rtTA+ | DN    | 7    | 1.18                                           |
| 125 | DNT5+/rtTA- | CT    | 7    | 8.23                                           |
| 126 | DNT5+/rtTA- | CT    | 7    | 2.98                                           |
| 127 | DNT5+/rtTA+ | DN    | 7    | 3.84                                           |
| 128 | DNT5+/rtTA+ | DN    | 8    | 8.25                                           |
| 129 | DNT5+/rtTA+ | DN    | 8    | 2.42                                           |
| 130 | DNT5-/rtTA+ | CT    | 8    | 3.19                                           |
| 134 | DNT5+/rtTA- | CT    | 10   | 1.18                                           |
| 135 | DNT5+/rtTA+ | DN    | 10   | 0.96                                           |
| 136 | DNT5+/rtTA+ | DN    | 10   | 0.49                                           |
| 137 | DNT5+/rtTA+ | DN    | 11   | 0.66                                           |
| 138 | DNT5-/rtTA- | CT    | 11   |                                                |
| 139 | DNT5-/rtTA- | CT    | 11   | 0.81                                           |
| 140 | DNT5+/rtTA+ | DN    | 12   | 1.46                                           |
| 141 | DNT5-/rtTA+ | CT    | 12   | 1.00                                           |
| 142 | DNT5-/rtTA- | CT    | 12   | 0.71                                           |
| 143 | DNT5+/rtTA+ | DN    | 12   |                                                |

| ID  | GENOTYPE    | GROUP | CAGE | Adipose tissue Ccl5 mRNA<br>relative abundance |
|-----|-------------|-------|------|------------------------------------------------|
| 49  | DNT5+/rtTA- | CT    | 1    |                                                |
| 50  | DNT5+/rtTA+ | DN    | 1    |                                                |
| 51  | DNT5+/rtTA- | CT    | 2    |                                                |
| 52  | DNT5+/rtTA+ | DN    | 2    |                                                |
| 112 | DNT5+/rtTA+ | DN    | 4    | 3.03                                           |
| 113 | DNT5+/rtTA- | CT    | 4    | 3.18                                           |
| 118 | DNT5+/rtTA+ | DN    | 5    | 2.11                                           |
| 119 | DNT5-/rtTA+ | CT    | 5    | 3.67                                           |
| 120 | DNT5+/rtTA+ | DN    | 5    | 3.62                                           |
| 121 | DNT5+/rtTA+ | DN    | 6    | 3.39                                           |
| 122 | DNT5-/rtTA- | CT    | 6    | 3.35                                           |
| 123 | DNT5+/rtTA+ | DN    | 6    | 2.71                                           |
| 124 | DNT5+/rtTA+ | DN    | 7    | 2.44                                           |
| 125 | DNT5+/rtTA- | CT    | 7    | 4.24                                           |
| 126 | DNT5+/rtTA- | CT    | 7    | 2.73                                           |
| 127 | DNT5+/rtTA+ | DN    | 7    | 2.43                                           |
| 128 | DNT5+/rtTA+ | DN    | 8    | 6.63                                           |
| 129 | DNT5+/rtTA+ | DN    | 8    | 2.24                                           |
| 130 | DNT5-/rtTA+ | CT    | 8    | 2.64                                           |
| 134 | DNT5+/rtTA- | CT    | 10   | 0.96                                           |
| 135 | DNT5+/rtTA+ | DN    | 10   | 2.43                                           |
| 136 | DNT5+/rtTA+ | DN    | 10   | 0.97                                           |
| 137 | DNT5+/rtTA+ | DN    | 11   | 1.63                                           |
| 138 | DNT5-/rtTA- | CT    | 11   |                                                |
| 139 | DNT5-/rtTA- | CT    | 11   | 1.12                                           |
| 140 | DNT5+/rtTA+ | DN    | 12   | 3.45                                           |
| 141 | DNT5-/rtTA+ | CT    | 12   | 1.57                                           |
| 142 | DNT5-/rtTA- | CT    | 12   | 1.69                                           |
| 143 | DNT5+/rtTA+ | DN    | 12   |                                                |

| ID  | GENOTYPE    | GROUP | CAGE | Adipose tissue Ccl7 mRNA<br>relative abundance |
|-----|-------------|-------|------|------------------------------------------------|
| 49  | DNT5+/rtTA- | CT    | 1    |                                                |
| 50  | DNT5+/rtTA+ | DN    | 1    |                                                |
| 51  | DNT5+/rtTA- | CT    | 2    |                                                |
| 52  | DNT5+/rtTA+ | DN    | 2    |                                                |
| 112 | DNT5+/rtTA+ | DN    | 4    | 2.41                                           |
| 113 | DNT5+/rtTA- | CT    | 4    | 1.94                                           |
| 118 | DNT5+/rtTA+ | DN    | 5    | 0.04                                           |
| 119 | DNT5-/rtTA+ | CT    | 5    | 9.11                                           |
| 120 | DNT5+/rtTA+ | DN    | 5    | 2.60                                           |
| 121 | DNT5+/rtTA+ | DN    | 6    | 1.76                                           |
| 122 | DNT5-/rtTA- | CT    | 6    | 3.89                                           |
| 123 | DNT5+/rtTA+ | DN    | 6    | 0.99                                           |
| 124 | DNT5+/rtTA+ | DN    | 7    | 0.38                                           |
| 125 | DNT5+/rtTA- | CT    | 7    | 4.79                                           |
| 126 | DNT5+/rtTA- | CT    | 7    | 1.91                                           |
| 127 | DNT5+/rtTA+ | DN    | 7    | 1.76                                           |
| 128 | DNT5+/rtTA+ | DN    | 8    | 8.56                                           |
| 129 | DNT5+/rtTA+ | DN    | 8    | 0.70                                           |
| 130 | DNT5-/rtTA+ | CT    | 8    | 2.99                                           |
| 134 | DNT5+/rtTA- | CT    | 10   | 0.42                                           |
| 135 | DNT5+/rtTA+ | DN    | 10   | 0.39                                           |
| 136 | DNT5+/rtTA+ | DN    | 10   | 0.12                                           |
| 137 | DNT5+/rtTA+ | DN    | 11   | 0.41                                           |
| 138 | DNT5-/rtTA- | CT    | 11   |                                                |
| 139 | DNT5-/rtTA- | CT    | 11   | 0.57                                           |
| 140 | DNT5+/rtTA+ | DN    | 12   | 0.61                                           |
| 141 | DNT5-/rtTA+ | CT    | 12   | 0.42                                           |
| 142 | DNT5-/rtTA- | CT    | 12   | 0.21                                           |
| 143 | DNT5+/rtTA+ | DN    | 12   |                                                |

| <b>ID</b> | <b>GENOTYPE</b> | <b>GROUP</b> | <b>CAGE</b> | <b>Whole aorta atherosclerosis<br/>area coverage (%)</b> |
|-----------|-----------------|--------------|-------------|----------------------------------------------------------|
| 49        | DNT5+/rtTA-     | CT           | 1           | 1.30                                                     |
| 50        | DNT5+/rtTA+     | DN           | 1           | 1.31                                                     |
| 51        | DNT5+/rtTA-     | CT           | 2           | 6.01                                                     |
| 52        | DNT5+/rtTA+     | DN           | 2           | 0.92                                                     |
| 112       | DNT5+/rtTA+     | DN           | 4           | 2.79                                                     |
| 113       | DNT5+/rtTA-     | CT           | 4           | 3.76                                                     |
| 118       | DNT5+/rtTA+     | DN           | 5           | 3.65                                                     |
| 119       | DNT5-/rtTA+     | CT           | 5           | 5.22                                                     |
| 120       | DNT5+/rtTA+     | DN           | 5           | 3.06                                                     |
| 121       | DNT5+/rtTA+     | DN           | 6           | 2.91                                                     |
| 122       | DNT5-/rtTA-     | CT           | 6           | 3.93                                                     |
| 123       | DNT5+/rtTA+     | DN           | 6           | 3.54                                                     |
| 124       | DNT5+/rtTA+     | DN           | 7           | 3.07                                                     |
| 125       | DNT5+/rtTA-     | CT           | 7           | 4.00                                                     |
| 126       | DNT5+/rtTA-     | CT           | 7           | 3.74                                                     |
| 127       | DNT5+/rtTA+     | DN           | 7           | 3.10                                                     |
| 128       | DNT5+/rtTA+     | DN           | 8           | 3.06                                                     |
| 129       | DNT5+/rtTA+     | DN           | 8           | 3.89                                                     |
| 130       | DNT5-/rtTA+     | CT           | 8           | 1.07                                                     |
| 134       | DNT5+/rtTA-     | CT           | 10          | 5.26                                                     |
| 135       | DNT5+/rtTA+     | DN           | 10          | 4.64                                                     |
| 136       | DNT5+/rtTA+     | DN           | 10          | 0.76                                                     |
| 137       | DNT5+/rtTA+     | DN           | 11          | 2.97                                                     |
| 138       | DNT5-/rtTA-     | CT           | 11          | 2.65                                                     |
| 139       | DNT5-/rtTA-     | CT           | 11          | 2.02                                                     |
| 140       | DNT5+/rtTA+     | DN           | 12          | 3.57                                                     |
| 141       | DNT5-/rtTA+     | CT           | 12          | 6.68                                                     |
| 142       | DNT5-/rtTA-     | CT           | 12          | 5.07                                                     |
| 143       | DNT5+/rtTA+     | DN           | 12          | 2.62                                                     |

| <b>ID</b> | <b>GENOTYPE</b> | <b>GROUP</b> | <b>CAGE</b> | <b>Aortic arch atherosclerosis<br/>area coverage (%)</b> |
|-----------|-----------------|--------------|-------------|----------------------------------------------------------|
| 49        | DNT5+/rtTA-     | CT           | 1           | 5.14                                                     |
| 50        | DNT5+/rtTA+     | DN           | 1           | 4.91                                                     |
| 51        | DNT5+/rtTA-     | CT           | 2           | 11.99                                                    |
| 52        | DNT5+/rtTA+     | DN           | 2           | 2.82                                                     |
| 112       | DNT5+/rtTA+     | DN           | 4           | 9.72                                                     |
| 113       | DNT5+/rtTA-     | CT           | 4           | 7.58                                                     |
| 118       | DNT5+/rtTA+     | DN           | 5           | 4.77                                                     |
| 119       | DNT5-/rtTA+     | CT           | 5           | 8.30                                                     |
| 120       | DNT5+/rtTA+     | DN           | 5           | 5.85                                                     |
| 121       | DNT5+/rtTA+     | DN           | 6           | 6.93                                                     |
| 122       | DNT5-/rtTA-     | CT           | 6           | 7.92                                                     |
| 123       | DNT5+/rtTA+     | DN           | 6           | 8.25                                                     |
| 124       | DNT5+/rtTA+     | DN           | 7           | 10.64                                                    |
| 125       | DNT5+/rtTA-     | CT           | 7           | 7.63                                                     |
| 126       | DNT5+/rtTA-     | CT           | 7           | 8.73                                                     |
| 127       | DNT5+/rtTA+     | DN           | 7           | 6.55                                                     |
| 128       | DNT5+/rtTA+     | DN           | 8           | 5.22                                                     |
| 129       | DNT5+/rtTA+     | DN           | 8           | 4.26                                                     |
| 130       | DNT5-/rtTA+     | CT           | 8           | 3.87                                                     |
| 134       | DNT5+/rtTA-     | CT           | 10          | 6.38                                                     |
| 135       | DNT5+/rtTA+     | DN           | 10          | 4.45                                                     |
| 136       | DNT5+/rtTA+     | DN           | 10          | 1.00                                                     |
| 137       | DNT5+/rtTA+     | DN           | 11          | 8.95                                                     |
| 138       | DNT5-/rtTA-     | CT           | 11          | 11.13                                                    |
| 139       | DNT5-/rtTA-     | CT           | 11          | 4.94                                                     |
| 140       | DNT5+/rtTA+     | DN           | 12          | 9.65                                                     |
| 141       | DNT5-/rtTA+     | CT           | 12          | 9.68                                                     |
| 142       | DNT5-/rtTA-     | CT           | 12          | 10.34                                                    |
| 143       | DNT5+/rtTA+     | DN           | 12          | 11.19                                                    |



| <b>ID</b> | <b>GENOTYPE</b> | <b>GROUP</b> | <b>CAGE</b> | <b>Aortic conduit<br/>atherosclerosis area</b> |
|-----------|-----------------|--------------|-------------|------------------------------------------------|
| 49        | DNT5+/rtTA-     | CT           | 1           | 0.10                                           |
| 50        | DNT5+/rtTA+     | DN           | 1           | 0.27                                           |
| 51        | DNT5+/rtTA-     | CT           | 2           | 1.81                                           |
| 52        | DNT5+/rtTA+     | DN           | 2           | 0.12                                           |
| 112       | DNT5+/rtTA+     | DN           | 4           | 0.77                                           |
| 113       | DNT5+/rtTA-     | CT           | 4           | 1.36                                           |
| 118       | DNT5+/rtTA+     | DN           | 5           | 1.40                                           |
| 119       | DNT5-/rtTA+     | CT           | 5           | 1.10                                           |
| 120       | DNT5+/rtTA+     | DN           | 5           | 1.96                                           |
| 121       | DNT5+/rtTA+     | DN           | 6           | 2.02                                           |
| 122       | DNT5-/rtTA-     | CT           | 6           | 1.77                                           |
| 123       | DNT5+/rtTA+     | DN           | 6           | 1.66                                           |
| 124       | DNT5+/rtTA+     | DN           | 7           | 0.89                                           |
| 125       | DNT5+/rtTA-     | CT           | 7           | 0.22                                           |
| 126       | DNT5+/rtTA-     | CT           | 7           | 1.27                                           |
| 127       | DNT5+/rtTA+     | DN           | 7           | 0.65                                           |
| 128       | DNT5+/rtTA+     | DN           | 8           | 2.52                                           |
| 129       | DNT5+/rtTA+     | DN           | 8           | 1.05                                           |
| 130       | DNT5-/rtTA+     | CT           | 8           | 0.07                                           |
| 134       | DNT5+/rtTA-     | CT           | 10          | 3.05                                           |
| 135       | DNT5+/rtTA+     | DN           | 10          | 2.70                                           |
| 136       | DNT5+/rtTA+     | DN           | 10          | 0.37                                           |
| 137       | DNT5+/rtTA+     | DN           | 11          | 0.90                                           |
| 138       | DNT5-/rtTA-     | CT           | 11          | 0.98                                           |
| 139       | DNT5-/rtTA-     | CT           | 11          | 1.03                                           |
| 140       | DNT5+/rtTA+     | DN           | 12          | 1.41                                           |
| 141       | DNT5-/rtTA+     | CT           | 12          | 2.69                                           |
| 142       | DNT5-/rtTA-     | CT           | 12          | 3.90                                           |
| 143       | DNT5+/rtTA+     | DN           | 12          | 0.35                                           |

| ID  | GENOTYPE    | GROUP | CAGE | Weight gain 6 weeks (%) |
|-----|-------------|-------|------|-------------------------|
| 49  | DNT5+/rtTA- | CT    | 1    |                         |
| 50  | DNT5+/rtTA+ | DN    | 1    |                         |
| 51  | DNT5+/rtTA- | CT    | 2    |                         |
| 52  | DNT5+/rtTA+ | DN    | 2    |                         |
| 112 | DNT5+/rtTA+ | DN    | 4    |                         |
| 113 | DNT5+/rtTA- | CT    | 4    |                         |
| 118 | DNT5+/rtTA+ | DN    | 5    | 30.0                    |
| 119 | DNT5-/rtTA+ | CT    | 5    | 55.9                    |
| 120 | DNT5+/rtTA+ | DN    | 5    | 38.2                    |
| 121 | DNT5+/rtTA+ | DN    | 6    | 40.7                    |
| 122 | DNT5-/rtTA- | CT    | 6    | 53.0                    |
| 123 | DNT5+/rtTA+ | DN    | 6    | 39.7                    |
| 124 | DNT5+/rtTA+ | DN    | 7    | 28.7                    |
| 125 | DNT5+/rtTA- | CT    | 7    | 64.7                    |
| 126 | DNT5+/rtTA- | CT    | 7    | 49.1                    |
| 127 | DNT5+/rtTA+ | DN    | 7    | 30.7                    |
| 128 | DNT5+/rtTA+ | DN    | 8    | 53.4                    |
| 129 | DNT5+/rtTA+ | DN    | 8    | 34.7                    |
| 130 | DNT5-/rtTA+ | CT    | 8    | 44.8                    |
| 134 | DNT5+/rtTA- | CT    | 10   | 43.7                    |
| 135 | DNT5+/rtTA+ | DN    | 10   | 25.0                    |
| 136 | DNT5+/rtTA+ | DN    | 10   | 14.4                    |
| 137 | DNT5+/rtTA+ | DN    | 11   | 28.4                    |
| 138 | DNT5-/rtTA- | CT    | 11   | 26.6                    |
| 139 | DNT5-/rtTA- | CT    | 11   | 25.9                    |
| 140 | DNT5+/rtTA+ | DN    | 12   | 22.6                    |
| 141 | DNT5-/rtTA+ | CT    | 12   | 40.2                    |
| 142 | DNT5-/rtTA- | CT    | 12   | 30.2                    |
| 143 | DNT5+/rtTA+ | DN    | 12   | 22.4                    |

| <b>ID</b> | <b>GENOTYPE</b> | <b>GROUP</b> | <b>CAGE</b> | <b>Weight gain<br/>12 weeks (%)</b> |
|-----------|-----------------|--------------|-------------|-------------------------------------|
| 49        | DNT5+/rtTA-     | CT           | 1           |                                     |
| 50        | DNT5+/rtTA+     | DN           | 1           |                                     |
| 51        | DNT5+/rtTA-     | CT           | 2           |                                     |
| 52        | DNT5+/rtTA+     | DN           | 2           |                                     |
| 112       | DNT5+/rtTA+     | DN           | 4           |                                     |
| 113       | DNT5+/rtTA-     | CT           | 4           |                                     |
| 118       | DNT5+/rtTA+     | DN           | 5           | 69.6                                |
| 119       | DNT5-/rtTA+     | CT           | 5           | 94.9                                |
| 120       | DNT5+/rtTA+     | DN           | 5           | 66.9                                |
| 121       | DNT5+/rtTA+     | DN           | 6           | 84.5                                |
| 122       | DNT5-/rtTA-     | CT           | 6           | 112.1                               |
| 123       | DNT5+/rtTA+     | DN           | 6           | 70.3                                |
| 124       | DNT5+/rtTA+     | DN           | 7           | 50.9                                |
| 125       | DNT5+/rtTA-     | CT           | 7           | 127.9                               |
| 126       | DNT5+/rtTA-     | CT           | 7           | 87.2                                |
| 127       | DNT5+/rtTA+     | DN           | 7           | 67.6                                |
| 128       | DNT5+/rtTA+     | DN           | 8           | 105.3                               |
| 129       | DNT5+/rtTA+     | DN           | 8           | 57.5                                |
| 130       | DNT5-/rtTA+     | CT           | 8           | 101.5                               |
| 134       | DNT5+/rtTA-     | CT           | 10          | 84.9                                |
| 135       | DNT5+/rtTA+     | DN           | 10          | 44.7                                |
| 136       | DNT5+/rtTA+     | DN           | 10          | 30.0                                |
| 137       | DNT5+/rtTA+     | DN           | 11          | 65.1                                |
| 138       | DNT5-/rtTA-     | CT           | 11          | 59.6                                |
| 139       | DNT5-/rtTA-     | CT           | 11          | 78.9                                |
| 140       | DNT5+/rtTA+     | DN           | 12          | 50.0                                |
| 141       | DNT5-/rtTA+     | CT           | 12          | 73.4                                |
| 142       | DNT5-/rtTA-     | CT           | 12          | 62.0                                |
| 143       | DNT5+/rtTA+     | DN           | 12          | 49.8                                |

| ID  | GENOTYPE    | GROUP | CAGE | Adipocyte Area<br>( $\mu\text{m}^2$ ) |
|-----|-------------|-------|------|---------------------------------------|
| 49  | DNT5+/rtTA- | CT    | 1    |                                       |
| 50  | DNT5+/rtTA+ | DN    | 1    |                                       |
| 51  | DNT5+/rtTA- | CT    | 2    |                                       |
| 52  | DNT5+/rtTA+ | DN    | 2    |                                       |
| 112 | DNT5+/rtTA+ | DN    | 4    | 4847.8                                |
| 113 | DNT5+/rtTA- | CT    | 4    | 4819.1                                |
| 118 | DNT5+/rtTA+ | DN    | 5    | 4243.9                                |
| 119 | DNT5-/rtTA+ | CT    | 5    | 4764.1                                |
| 120 | DNT5+/rtTA+ | DN    | 5    | 4304.2                                |
| 121 | DNT5+/rtTA+ | DN    | 6    | 4156.1                                |
| 122 | DNT5-/rtTA- | CT    | 6    | 4528.6                                |
| 123 | DNT5+/rtTA+ | DN    | 6    | 3780.8                                |
| 124 | DNT5+/rtTA+ | DN    | 7    | 2862.6                                |
| 125 | DNT5+/rtTA- | CT    | 7    | 5498.6                                |
| 126 | DNT5+/rtTA- | CT    | 7    | 5367.7                                |
| 127 | DNT5+/rtTA+ | DN    | 7    | 3822.6                                |
| 128 | DNT5+/rtTA+ | DN    | 8    | 6574.7                                |
| 129 | DNT5+/rtTA+ | DN    | 8    | 3349.3                                |
| 130 | DNT5-/rtTA+ | CT    | 8    | 4262.4                                |
| 134 | DNT5+/rtTA- | CT    | 10   | 5143.1                                |
| 135 | DNT5+/rtTA+ | DN    | 10   | 3305.9                                |
| 136 | DNT5+/rtTA+ | DN    | 10   | 2666.2                                |
| 137 | DNT5+/rtTA+ | DN    | 11   | 3634.2                                |
| 138 | DNT5-/rtTA- | CT    | 11   | 4357.5                                |
| 139 | DNT5-/rtTA- | CT    | 11   | 4433.5                                |
| 140 | DNT5+/rtTA+ | DN    | 12   | 4192.4                                |
| 141 | DNT5-/rtTA+ | CT    | 12   | 4396.4                                |
| 142 | DNT5-/rtTA- | CT    | 12   | 1645.3                                |
| 143 | DNT5+/rtTA+ | DN    | 12   | 4131.8                                |

| <b>ID</b> | <b>GENOTYPE</b> | <b>GROUP</b> | <b>CAGE</b> | <b>Liver steatosis area coverage (%)</b> |
|-----------|-----------------|--------------|-------------|------------------------------------------|
| 49        | DNT5+/rtTA-     | CT           | 1           |                                          |
| 50        | DNT5+/rtTA+     | DN           | 1           |                                          |
| 51        | DNT5+/rtTA-     | CT           | 2           |                                          |
| 52        | DNT5+/rtTA+     | DN           | 2           |                                          |
| 112       | DNT5+/rtTA+     | DN           | 4           | 29.4                                     |
| 113       | DNT5+/rtTA-     | CT           | 4           | 36.2                                     |
| 118       | DNT5+/rtTA+     | DN           | 5           | 28.5                                     |
| 119       | DNT5-/rtTA+     | CT           | 5           | 26.0                                     |
| 120       | DNT5+/rtTA+     | DN           | 5           | 31.0                                     |
| 121       | DNT5+/rtTA+     | DN           | 6           | 22.7                                     |
| 122       | DNT5-/rtTA-     | CT           | 6           | 29.4                                     |
| 123       | DNT5+/rtTA+     | DN           | 6           | 16.3                                     |
| 124       | DNT5+/rtTA+     | DN           | 7           | 11.8                                     |
| 125       | DNT5+/rtTA-     | CT           | 7           | 28.4                                     |
| 126       | DNT5+/rtTA-     | CT           | 7           | 30.2                                     |
| 127       | DNT5+/rtTA+     | DN           | 7           | 26.8                                     |
| 128       | DNT5+/rtTA+     | DN           | 8           | 32.6                                     |
| 129       | DNT5+/rtTA+     | DN           | 8           | 24.2                                     |
| 130       | DNT5-/rtTA+     | CT           | 8           | 34.8                                     |
| 134       | DNT5+/rtTA-     | CT           | 10          | 26.4                                     |
| 135       | DNT5+/rtTA+     | DN           | 10          | 20.2                                     |
| 136       | DNT5+/rtTA+     | DN           | 10          | 1.4                                      |
| 137       | DNT5+/rtTA+     | DN           | 11          | 18.3                                     |
| 138       | DNT5-/rtTA-     | CT           | 11          | 19.8                                     |
| 139       | DNT5-/rtTA-     | CT           | 11          | 22.0                                     |
| 140       | DNT5+/rtTA+     | DN           | 12          | 19.4                                     |
| 141       | DNT5-/rtTA+     | CT           | 12          | 26.3                                     |
| 142       | DNT5-/rtTA-     | CT           | 12          | 15.9                                     |
| 143       | DNT5+/rtTA+     | DN           | 12          | 29.6                                     |

| <b>ID</b> | <b>GENOTYPE</b> | <b>GROUP</b> | <b>CAGE</b> | <b>Liver Srebp1c mRNA<br/>relative abundance</b> |
|-----------|-----------------|--------------|-------------|--------------------------------------------------|
| 49        | DNT5+/rtTA-     | CT           | 1           |                                                  |
| 50        | DNT5+/rtTA+     | DN           | 1           |                                                  |
| 51        | DNT5+/rtTA-     | CT           | 2           |                                                  |
| 52        | DNT5+/rtTA+     | DN           | 2           |                                                  |
| 112       | DNT5+/rtTA+     | DN           | 4           | 4.6                                              |
| 113       | DNT5+/rtTA-     | CT           | 4           | 5.1                                              |
| 118       | DNT5+/rtTA+     | DN           | 5           | 7.7                                              |
| 119       | DNT5-/rtTA+     | CT           | 5           | 11.0                                             |
| 120       | DNT5+/rtTA+     | DN           | 5           | 7.6                                              |
| 121       | DNT5+/rtTA+     | DN           | 6           | 6.3                                              |
| 122       | DNT5-/rtTA-     | CT           | 6           | 11.4                                             |
| 123       | DNT5+/rtTA+     | DN           | 6           | 5.4                                              |
| 124       | DNT5+/rtTA+     | DN           | 7           | 7.2                                              |
| 125       | DNT5+/rtTA-     | CT           | 7           | 9.3                                              |
| 126       | DNT5+/rtTA-     | CT           | 7           | 8.2                                              |
| 127       | DNT5+/rtTA+     | DN           | 7           | 7.0                                              |
| 128       | DNT5+/rtTA+     | DN           | 8           | 13.4                                             |
| 129       | DNT5+/rtTA+     | DN           | 8           | 10.5                                             |
| 130       | DNT5-/rtTA+     | CT           | 8           | 10.7                                             |
| 134       | DNT5+/rtTA-     | CT           | 10          | 7.0                                              |
| 135       | DNT5+/rtTA+     | DN           | 10          | 7.7                                              |
| 136       | DNT5+/rtTA+     | DN           | 10          |                                                  |
| 137       | DNT5+/rtTA+     | DN           | 11          | 19.8                                             |
| 138       | DNT5-/rtTA-     | CT           | 11          | 18.3                                             |
| 139       | DNT5-/rtTA-     | CT           | 11          | 13.1                                             |
| 140       | DNT5+/rtTA+     | DN           | 12          | 15.2                                             |
| 141       | DNT5-/rtTA+     | CT           | 12          | 8.3                                              |
| 142       | DNT5-/rtTA-     | CT           | 12          | 11.4                                             |
| 143       | DNT5+/rtTA+     | DN           | 12          | 5.7                                              |

| ID  | GENOTYPE    | GROUP | CAGE | Liver Acaca mRNA relative abundance |
|-----|-------------|-------|------|-------------------------------------|
| 49  | DNT5+/rtTA- | CT    | 1    |                                     |
| 50  | DNT5+/rtTA+ | DN    | 1    |                                     |
| 51  | DNT5+/rtTA- | CT    | 2    |                                     |
| 52  | DNT5+/rtTA+ | DN    | 2    |                                     |
| 112 | DNT5+/rtTA+ | DN    | 4    | 2.58                                |
| 113 | DNT5+/rtTA- | CT    | 4    | 4.90                                |
| 118 | DNT5+/rtTA+ | DN    | 5    | 3.06                                |
| 119 | DNT5-/rtTA+ | CT    | 5    | 8.22                                |
| 120 | DNT5+/rtTA+ | DN    | 5    | 6.31                                |
| 121 | DNT5+/rtTA+ | DN    | 6    | 4.34                                |
| 122 | DNT5-/rtTA- | CT    | 6    | 6.48                                |
| 123 | DNT5+/rtTA+ | DN    | 6    | 1.93                                |
| 124 | DNT5+/rtTA+ | DN    | 7    | 2.50                                |
| 125 | DNT5+/rtTA- | CT    | 7    | 7.67                                |
| 126 | DNT5+/rtTA- | CT    | 7    | 8.02                                |
| 127 | DNT5+/rtTA+ | DN    | 7    | 8.36                                |
| 128 | DNT5+/rtTA+ | DN    | 8    | 10.18                               |
| 129 | DNT5+/rtTA+ | DN    | 8    | 6.37                                |
| 130 | DNT5-/rtTA+ | CT    | 8    | 12.84                               |
| 134 | DNT5+/rtTA- | CT    | 10   | 6.24                                |
| 135 | DNT5+/rtTA+ | DN    | 10   | 8.15                                |
| 136 | DNT5+/rtTA+ | DN    | 10   |                                     |
| 137 | DNT5+/rtTA+ | DN    | 11   | 7.02                                |
| 138 | DNT5-/rtTA- | CT    | 11   | 8.71                                |
| 139 | DNT5-/rtTA- | CT    | 11   | 6.39                                |
| 140 | DNT5+/rtTA+ | DN    | 12   | 3.49                                |
| 141 | DNT5-/rtTA+ | CT    | 12   | 1.18                                |
| 142 | DNT5-/rtTA- | CT    | 12   | 5.30                                |
| 143 | DNT5+/rtTA+ | DN    | 12   | 2.07                                |

| ID  | GENOTYPE    | GROUP | CAGE | Liver Fasn mRNA relative abundance |
|-----|-------------|-------|------|------------------------------------|
| 49  | DNT5+/rtTA- | CT    | 1    |                                    |
| 50  | DNT5+/rtTA+ | DN    | 1    |                                    |
| 51  | DNT5+/rtTA- | CT    | 2    |                                    |
| 52  | DNT5+/rtTA+ | DN    | 2    |                                    |
| 112 | DNT5+/rtTA+ | DN    | 4    | 0.56                               |
| 113 | DNT5+/rtTA- | CT    | 4    | 2.17                               |
| 118 | DNT5+/rtTA+ | DN    | 5    | 0.59                               |
| 119 | DNT5-/rtTA+ | CT    | 5    | 3.19                               |
| 120 | DNT5+/rtTA+ | DN    | 5    | 1.20                               |
| 121 | DNT5+/rtTA+ | DN    | 6    | 1.67                               |
| 122 | DNT5-/rtTA- | CT    | 6    | 2.31                               |
| 123 | DNT5+/rtTA+ | DN    | 6    | 0.31                               |
| 124 | DNT5+/rtTA+ | DN    | 7    | 0.50                               |
| 125 | DNT5+/rtTA- | CT    | 7    | 2.35                               |
| 126 | DNT5+/rtTA- | CT    | 7    | 1.80                               |
| 127 | DNT5+/rtTA+ | DN    | 7    | 2.14                               |
| 128 | DNT5+/rtTA+ | DN    | 8    | 2.84                               |
| 129 | DNT5+/rtTA+ | DN    | 8    | 1.16                               |
| 130 | DNT5-/rtTA+ | CT    | 8    | 3.13                               |
| 134 | DNT5+/rtTA- | CT    | 10   | 1.66                               |
| 135 | DNT5+/rtTA+ | DN    | 10   | 1.42                               |
| 136 | DNT5+/rtTA+ | DN    | 10   |                                    |
| 137 | DNT5+/rtTA+ | DN    | 11   | 3.63                               |
| 138 | DNT5-/rtTA- | CT    | 11   | 2.61                               |
| 139 | DNT5-/rtTA- | CT    | 11   | 2.08                               |
| 140 | DNT5+/rtTA+ | DN    | 12   | 1.32                               |
| 141 | DNT5-/rtTA+ | CT    | 12   | 0.45                               |
| 142 | DNT5-/rtTA- | CT    | 12   | 1.02                               |
| 143 | DNT5+/rtTA+ | DN    | 12   | 0.61                               |



| ID  | GENOTYPE    | GROUP | CAGE | Liver Scd1 mRNA relative abundance |
|-----|-------------|-------|------|------------------------------------|
| 49  | DNT5+/rtTA- | CT    | 1    |                                    |
| 50  | DNT5+/rtTA+ | DN    | 1    |                                    |
| 51  | DNT5+/rtTA- | CT    | 2    |                                    |
| 52  | DNT5+/rtTA+ | DN    | 2    |                                    |
| 112 | DNT5+/rtTA+ | DN    | 4    | 1.80                               |
| 113 | DNT5+/rtTA- | CT    | 4    | 3.98                               |
| 118 | DNT5+/rtTA+ | DN    | 5    | 2.29                               |
| 119 | DNT5-/rtTA+ | CT    | 5    | 5.68                               |
| 120 | DNT5+/rtTA+ | DN    | 5    | 2.26                               |
| 121 | DNT5+/rtTA+ | DN    | 6    | 3.42                               |
| 122 | DNT5-/rtTA- | CT    | 6    | 4.61                               |
| 123 | DNT5+/rtTA+ | DN    | 6    | 0.27                               |
| 124 | DNT5+/rtTA+ | DN    | 7    | 1.06                               |
| 125 | DNT5+/rtTA- | CT    | 7    | 8.67                               |
| 126 | DNT5+/rtTA- | CT    | 7    | 4.50                               |
| 127 | DNT5+/rtTA+ | DN    | 7    | 7.89                               |
| 128 | DNT5+/rtTA+ | DN    | 8    | 4.48                               |
| 129 | DNT5+/rtTA+ | DN    | 8    | 2.46                               |
| 130 | DNT5-/rtTA+ | CT    | 8    | 6.40                               |
| 134 | DNT5+/rtTA- | CT    | 10   | 3.65                               |
| 135 | DNT5+/rtTA+ | DN    | 10   | 3.33                               |
| 136 | DNT5+/rtTA+ | DN    | 10   |                                    |
| 137 | DNT5+/rtTA+ | DN    | 11   | 4.30                               |
| 138 | DNT5-/rtTA- | CT    | 11   | 3.65                               |
| 139 | DNT5-/rtTA- | CT    | 11   | 2.51                               |
| 140 | DNT5+/rtTA+ | DN    | 12   | 2.92                               |
| 141 | DNT5-/rtTA+ | CT    | 12   | 1.08                               |
| 142 | DNT5-/rtTA- | CT    | 12   | 2.47                               |
| 143 | DNT5+/rtTA+ | DN    | 12   | 1.69                               |

| ID  | GENOTYPE    | GROUP | CAGE | Cholesterol plasma concentration (mmol/L) |
|-----|-------------|-------|------|-------------------------------------------|
| 49  | DNT5+/rtTA- | CT    | 1    |                                           |
| 50  | DNT5+/rtTA+ | DN    | 1    |                                           |
| 51  | DNT5+/rtTA- | CT    | 2    |                                           |
| 52  | DNT5+/rtTA+ | DN    | 2    |                                           |
| 112 | DNT5+/rtTA+ | DN    | 4    | 24.1                                      |
| 113 | DNT5+/rtTA- | CT    | 4    |                                           |
| 118 | DNT5+/rtTA+ | DN    | 5    | 26.4                                      |
| 119 | DNT5-/rtTA+ | CT    | 5    | 20.5                                      |
| 120 | DNT5+/rtTA+ | DN    | 5    | 31.3                                      |
| 121 | DNT5+/rtTA+ | DN    | 6    |                                           |
| 122 | DNT5-/rtTA- | CT    | 6    | 20.2                                      |
| 123 | DNT5+/rtTA+ | DN    | 6    | 18.5                                      |
| 124 | DNT5+/rtTA+ | DN    | 7    | 21.6                                      |
| 125 | DNT5+/rtTA- | CT    | 7    | 24.5                                      |
| 126 | DNT5+/rtTA- | CT    | 7    | 21.9                                      |
| 127 | DNT5+/rtTA+ | DN    | 7    | 20.3                                      |
| 128 | DNT5+/rtTA+ | DN    | 8    | 22.8                                      |
| 129 | DNT5+/rtTA+ | DN    | 8    | 23.2                                      |
| 130 | DNT5-/rtTA+ | CT    | 8    | 24.1                                      |
| 134 | DNT5+/rtTA- | CT    | 10   | 24.6                                      |
| 135 | DNT5+/rtTA+ | DN    | 10   | 23.1                                      |
| 136 | DNT5+/rtTA+ | DN    | 10   | 8.2                                       |
| 137 | DNT5+/rtTA+ | DN    | 11   | 16.6                                      |
| 138 | DNT5-/rtTA- | CT    | 11   | 21.5                                      |
| 139 | DNT5-/rtTA- | CT    | 11   |                                           |
| 140 | DNT5+/rtTA+ | DN    | 12   | 19.1                                      |
| 141 | DNT5-/rtTA+ | CT    | 12   | 22.8                                      |
| 142 | DNT5-/rtTA- | CT    | 12   |                                           |
| 143 | DNT5+/rtTA+ | DN    | 12   | 18.6                                      |

| ID  | GENOTYPE    | GROUP | CAGE | HDL plasma concentration<br>(mmol/L) |
|-----|-------------|-------|------|--------------------------------------|
| 49  | DNT5+/rtTA- | CT    | 1    |                                      |
| 50  | DNT5+/rtTA+ | DN    | 1    |                                      |
| 51  | DNT5+/rtTA- | CT    | 2    |                                      |
| 52  | DNT5+/rtTA+ | DN    | 2    |                                      |
| 112 | DNT5+/rtTA+ | DN    | 4    | 0.4                                  |
| 113 | DNT5+/rtTA- | CT    | 4    |                                      |
| 118 | DNT5+/rtTA+ | DN    | 5    | 0.4                                  |
| 119 | DNT5-/rtTA+ | CT    | 5    | 0.3                                  |
| 120 | DNT5+/rtTA+ | DN    | 5    | 0.4                                  |
| 121 | DNT5+/rtTA+ | DN    | 6    |                                      |
| 122 | DNT5-/rtTA- | CT    | 6    | 0.5                                  |
| 123 | DNT5+/rtTA+ | DN    | 6    | 0.4                                  |
| 124 | DNT5+/rtTA+ | DN    | 7    | 0.3                                  |
| 125 | DNT5+/rtTA- | CT    | 7    | 0.3                                  |
| 126 | DNT5+/rtTA- | CT    | 7    | 0.3                                  |
| 127 | DNT5+/rtTA+ | DN    | 7    | 0.3                                  |
| 128 | DNT5+/rtTA+ | DN    | 8    | 0.3                                  |
| 129 | DNT5+/rtTA+ | DN    | 8    | 0.3                                  |
| 130 | DNT5-/rtTA+ | CT    | 8    | 0.3                                  |
| 134 | DNT5+/rtTA- | CT    | 10   | 0.5                                  |
| 135 | DNT5+/rtTA+ | DN    | 10   | 0.3                                  |
| 136 | DNT5+/rtTA+ | DN    | 10   |                                      |
| 137 | DNT5+/rtTA+ | DN    | 11   | 0.3                                  |
| 138 | DNT5-/rtTA- | CT    | 11   | 0.3                                  |
| 139 | DNT5-/rtTA- | CT    | 11   |                                      |
| 140 | DNT5+/rtTA+ | DN    | 12   | 0.3                                  |
| 141 | DNT5-/rtTA+ | CT    | 12   | 0.3                                  |
| 142 | DNT5-/rtTA- | CT    | 12   |                                      |
| 143 | DNT5+/rtTA+ | DN    | 12   | 0.5                                  |

| ID  | GENOTYPE    | GROUP | CAGE | LDL plasma concentration<br>(mmol/L) |
|-----|-------------|-------|------|--------------------------------------|
| 49  | DNT5+/rtTA- | CT    | 1    |                                      |
| 50  | DNT5+/rtTA+ | DN    | 1    |                                      |
| 51  | DNT5+/rtTA- | CT    | 2    |                                      |
| 52  | DNT5+/rtTA+ | DN    | 2    |                                      |
| 112 | DNT5+/rtTA+ | DN    | 4    | 22.8                                 |
| 113 | DNT5+/rtTA- | CT    | 4    |                                      |
| 118 | DNT5+/rtTA+ | DN    | 5    | 25.1                                 |
| 119 | DNT5-/rtTA+ | CT    | 5    | 19.1                                 |
| 120 | DNT5+/rtTA+ | DN    | 5    | 29.7                                 |
| 121 | DNT5+/rtTA+ | DN    | 6    |                                      |
| 122 | DNT5-/rtTA- | CT    | 6    | 18.8                                 |
| 123 | DNT5+/rtTA+ | DN    | 6    | 17.6                                 |
| 124 | DNT5+/rtTA+ | DN    | 7    | 20.3                                 |
| 125 | DNT5+/rtTA- | CT    | 7    | 23.2                                 |
| 126 | DNT5+/rtTA- | CT    | 7    | 20.6                                 |
| 127 | DNT5+/rtTA+ | DN    | 7    | 19.3                                 |
| 128 | DNT5+/rtTA+ | DN    | 8    | 22                                   |
| 129 | DNT5+/rtTA+ | DN    | 8    | 21.9                                 |
| 130 | DNT5-/rtTA+ | CT    | 8    | 22.8                                 |
| 134 | DNT5+/rtTA- | CT    | 10   | 23.2                                 |
| 135 | DNT5+/rtTA+ | DN    | 10   | 21.9                                 |
| 136 | DNT5+/rtTA+ | DN    | 10   |                                      |
| 137 | DNT5+/rtTA+ | DN    | 11   | 15.7                                 |
| 138 | DNT5-/rtTA- | CT    | 11   | 20.5                                 |
| 139 | DNT5-/rtTA- | CT    | 11   |                                      |
| 140 | DNT5+/rtTA+ | DN    | 12   | 18.2                                 |
| 141 | DNT5-/rtTA+ | CT    | 12   | 21.5                                 |
| 142 | DNT5-/rtTA- | CT    | 12   |                                      |
| 143 | DNT5+/rtTA+ | DN    | 12   | 17.3                                 |

| <b>ID</b> | <b>GENOTYPE</b> | <b>GROUP</b> | <b>CAGE</b> | <b>Triglycerides plasma concentration (mmol/L)</b> |
|-----------|-----------------|--------------|-------------|----------------------------------------------------|
| 49        | DNT5+/rtTA-     | CT           | 1           |                                                    |
| 50        | DNT5+/rtTA+     | DN           | 1           |                                                    |
| 51        | DNT5+/rtTA-     | CT           | 2           |                                                    |
| 52        | DNT5+/rtTA+     | DN           | 2           |                                                    |
| 112       | DNT5+/rtTA+     | DN           | 4           | 2                                                  |
| 113       | DNT5+/rtTA-     | CT           | 4           | 2.4                                                |
| 118       | DNT5+/rtTA+     | DN           | 5           | 2.1                                                |
| 119       | DNT5-/rtTA+     | CT           | 5           | 2.6                                                |
| 120       | DNT5+/rtTA+     | DN           | 5           | 2.7                                                |
| 121       | DNT5+/rtTA+     | DN           | 6           | 3.2                                                |
| 122       | DNT5-/rtTA-     | CT           | 6           | 2                                                  |
| 123       | DNT5+/rtTA+     | DN           | 6           | 1.1                                                |
| 124       | DNT5+/rtTA+     | DN           | 7           | 2.2                                                |
| 125       | DNT5+/rtTA-     | CT           | 7           | 2.2                                                |
| 126       | DNT5+/rtTA-     | CT           | 7           | 2.2                                                |
| 127       | DNT5+/rtTA+     | DN           | 7           | 1.7                                                |
| 128       | DNT5+/rtTA+     | DN           | 8           | 1.1                                                |
| 129       | DNT5+/rtTA+     | DN           | 8           | 2.4                                                |
| 130       | DNT5-/rtTA+     | CT           | 8           | 2.2                                                |
| 134       | DNT5+/rtTA-     | CT           | 10          | 2.1                                                |
| 135       | DNT5+/rtTA+     | DN           | 10          | 2.1                                                |
| 136       | DNT5+/rtTA+     | DN           | 10          | 0.6                                                |
| 137       | DNT5+/rtTA+     | DN           | 11          | 1.3                                                |
| 138       | DNT5-/rtTA-     | CT           | 11          | 1.7                                                |
| 139       | DNT5-/rtTA-     | CT           | 11          | 2.5                                                |
| 140       | DNT5+/rtTA+     | DN           | 12          | 1.3                                                |
| 141       | DNT5-/rtTA+     | CT           | 12          | 2.4                                                |
| 142       | DNT5-/rtTA-     | CT           | 12          | 1.9                                                |
| 143       | DNT5+/rtTA+     | DN           | 12          | 1.8                                                |

## Supplementary File 4

### Adipose tissue Adiponectin mRNA

- Log transformed outcome
- Separate variance for each cage

```
lme(log(MEASUREMENTS)~as.factor(GROUP),na.action=na.exclude,random=~1|CAGE,weights=varIdent(form=1|CAGE))
```

Linear mixed-effects model fit by REML

| AIC      | BIC      | logLik    |
|----------|----------|-----------|
| 54.23618 | 66.23765 | -16.11809 |

Random effects:

Formula: ~1 | CAGE

(Intercept) Residual

StdDev: 0.05721544 0.327978

Variance function:

Structure: Different standard deviations per stratum

Formula: ~1 | CAGE

Parameter estimates:

|  | 4         | 5         | 6         | 7         | 8         | 10        | 11        | 12        |
|--|-----------|-----------|-----------|-----------|-----------|-----------|-----------|-----------|
|  | 1.0000000 | 0.3108447 | 0.1478915 | 1.9500141 | 2.2698978 | 2.9893407 | 2.1503730 | 2.5430880 |

Fixed effects: log(MEASUREMENTS) ~ as.factor(GROUP)

|                    | Value     | Std.Error  | DF | t-value   | p-value |
|--------------------|-----------|------------|----|-----------|---------|
| (Intercept)        | 0.9914514 | 0.05880142 | 15 | 16.861011 | 0       |
| as.factor(GROUP)DN | 0.4837610 | 0.05271480 | 15 | 9.176948  | 0       |

Correlation:

|                    | (Intr) |
|--------------------|--------|
| as.factor(GROUP)DN | -0.585 |

Standardized Within-Group Residuals:

| Min        | Q1         | Med       | Q3        | Max       |
|------------|------------|-----------|-----------|-----------|
| -1.4517986 | -0.5715181 | 0.4326466 | 0.9476340 | 1.7014354 |

Number of Observations: 24

Number of Groups: 8

## Adipose tissue Leptin mRNA

- No random intercept

```
lm(MEASUREMENTS~as.factor(GROUP),na.action=na.exclude)
```

Call:

```
lm(formula = MEASUREMENTS ~ as.factor(GROUP), data = baptiste,  
    na.action = na.exclude)
```

Residuals:

```
    Min      1Q  Median      3Q     Max  
-6.300 -2.620 -0.560  1.635  5.800
```

Coefficients:

```
                Estimate Std. Error t value Pr(>|t|)  
(Intercept)         12.820      1.081  11.862 4.96e-11 ***  
as.factor(GROUP)DN   -0.220      1.415   -0.155  0.878  
---  
Signif. codes:  0 '***' 0.001 '**' 0.01 '*' 0.05 '.' 0.1 ' ' 1
```

Residual standard error: 3.418 on 22 degrees of freedom

(11 observations deleted due to missingness)

Multiple R-squared: 0.001098, Adjusted R-squared: -0.04431

F-statistic: 0.02417 on 1 and 22 DF, p-value: 0.8779

## Adipose Tissue Tnf $\alpha$ mRNA

- Log transformed outcome

```
lme(log(MEASUREMENTS)~as.factor(GROUP),na.action=na.exclude,random=~1|CAGE)
```

Linear mixed-effects model fit by REML

```
      AIC      BIC    logLik
53.68639 58.39861 -22.8432
```

Random effects:

```
Formula: ~1 | CAGE
```

```
(Intercept) Residual
```

```
StdDev:    0.247604 0.5189493
```

Fixed effects: log(MEASUREMENTS) ~ as.factor(GROUP)

```
              Value Std.Error DF   t-value p-value
(Intercept)    2.7541954 0.1725478 16 15.961926 0.0000
as.factor(GROUP)DN -0.5628675 0.2085491 16 -2.698968 0.0158
```

Correlation:

```
(Intr)
```

```
as.factor(GROUP)DN -0.644
```

Standardized Within-Group Residuals:

```
      Min      Q1      Med      Q3      Max
-1.6725677 -0.4910287 -0.1186797 0.5136341 2.1121970
```

Number of Observations: 26

Number of Groups: 9



## Adipose Tissue Il6 mRNA

lme(MEASUREMENTS~as.factor(GROUP),na.action=na.exclude,random=~1|CAGE)

Linear mixed-effects model fit by REML

| AIC      | BIC      | logLik    |
|----------|----------|-----------|
| 153.7599 | 158.3019 | -72.87997 |

Random effects:

Formula: ~1 | CAGE

(Intercept) Residual

StdDev: 3.762222 4.232612

Fixed effects: MEASUREMENTS ~ as.factor(GROUP)

|                    | Value     | Std.Error | DF | t-value   | p-value |
|--------------------|-----------|-----------|----|-----------|---------|
| (Intercept)        | 12.248834 | 1.806212  | 15 | 6.781502  | 0.0000  |
| as.factor(GROUP)DN | -4.481659 | 1.783115  | 15 | -2.513387 | 0.0239  |

Correlation:

(Intr)

as.factor(GROUP)DN -0.539

Standardized Within-Group Residuals:

| Min         | Q1          | Med         | Q3         | Max        |
|-------------|-------------|-------------|------------|------------|
| -1.50567381 | -0.49408593 | -0.03143692 | 0.39807985 | 1.79764299 |

Number of Observations: 25

Number of Groups: 9

## Adipose Tissue Il1 $\beta$ mRNA

- Log transformed outcome
- Separate variance for each cage

```
lme(log(MEASUREMENTS)~as.factor(GROUP),na.action=na.exclude,random=~1|CAGE,weights=varIdent(form
m=~1|CAGE))
```

Linear mixed-effects model fit by REML

```
      AIC      BIC    logLik
51.50191 65.12784 -13.75095
```

Random effects:

```
Formula: ~1 | CAGE
      (Intercept) Residual
StdDev:  0.2203154 0.2179007
```

Variance function:

```
Structure: Different standard deviations per stratum
Formula: ~1 | CAGE
Parameter estimates:
      4      5      6      7      8      9      10      11
12
1.00000000 2.83543986 1.59626891 1.93602280 3.03493341 1.01670964 2.35663960 4.22466494
0.03467693
```

Fixed effects: log(MEASUREMENTS) ~ as.factor(GROUP)

```
      Value Std.Error DF  t-value p-value
(Intercept)      0.2613991 0.10525641 15   2.48345  0.0253
as.factor(GROUP)DN -0.3480921 0.00924146 15  -37.66634  0.0000
```

Correlation:

```
      (Intr)
as.factor(GROUP)DN -0.039
```

Standardized Within-Group Residuals:

```
      Min      Q1      Med      Q3      Max
-1.33165049 -0.56574422 -0.03472342  0.80643271  1.55250694
```

Number of Observations: 25

Number of Groups: 9

## Adipose Tissue Ccl2 mRNA

- Log transformed outcome

```
lme(log(MEASUREMENTS)~as.factor(GROUP),na.action=na.exclude,random=~1|CAGE)
```

Linear mixed-effects model fit by REML

```
      AIC      BIC    logLik
71.2721 75.81408 -31.63605
```

Random effects:

```
Formula: ~1 | CAGE
```

```
(Intercept) Residual
```

```
StdDev:    0.865878 0.6270326
```

Fixed effects: log(MEASUREMENTS) ~ as.factor(GROUP)

```
              Value Std.Error DF   t-value p-value
(Intercept)    1.5810537 0.3433604 15   4.604647  0.0003
as.factor(GROUP)DN -0.8187237 0.2673886 15  -3.061924  0.0079
```

Correlation:

```
(Intr)
```

```
as.factor(GROUP)DN -0.392
```

Standardized Within-Group Residuals:

```
      Min      Q1      Med      Q3      Max
-1.62607729 -0.35049144  0.02538033  0.35756435  2.22361879
```

Number of Observations: 25

Number of Groups: 9

## Adipose tissue Ccl3 mRNA

- Log transformed outcome

```
lme(log(MEASUREMENTS)~as.factor(GROUP),na.action=na.exclude,random=~1|CAGE)
```

Linear mixed-effects model fit by REML

| AIC     | BIC      | logLik    |
|---------|----------|-----------|
| 61.5593 | 66.10128 | -26.77965 |

Random effects:

Formula: ~1 | CAGE

(Intercept) Residual

StdDev: 0.6421199 0.5256003

Fixed effects: log(MEASUREMENTS) ~ as.factor(GROUP)

|                    | Value      | Std.Error | DF | t-value   | p-value |
|--------------------|------------|-----------|----|-----------|---------|
| (Intercept)        | 0.9059330  | 0.2646800 | 15 | 3.422749  | 0.0038  |
| as.factor(GROUP)DN | -0.3028831 | 0.2234118 | 15 | -1.355716 | 0.1953  |

Correlation:

(Intr)

as.factor(GROUP)DN -0.426

Standardized Within-Group Residuals:

| Min          | Q1           | Med          | Q3          | Max         |
|--------------|--------------|--------------|-------------|-------------|
| -1.522076562 | -0.536108186 | -0.008631966 | 0.593118802 | 1.808921007 |

Number of Observations: 25

Number of Groups: 9

## Adipose tissue Ccl5 mRNA

lme(MEASUREMENTS~as.factor(GROUP),na.action=na.exclude,random=~1|CAGE)

Linear mixed-effects model fit by REML

| AIC      | BIC      | logLik    |
|----------|----------|-----------|
| 89.37191 | 93.91388 | -40.68595 |

Random effects:

Formula: ~1 | CAGE

(Intercept) Residual

StdDev: 0.4870267 1.192009

Fixed effects: MEASUREMENTS ~ as.factor(GROUP)

|                    | Value     | Std.Error | DF | t-value  | p-value |
|--------------------|-----------|-----------|----|----------|---------|
| (Intercept)        | 2.7151350 | 0.3834892 | 15 | 7.080082 | 0.0000  |
| as.factor(GROUP)DN | 0.1428942 | 0.4873623 | 15 | 0.293199 | 0.7734  |

Correlation:

(Intr)

as.factor(GROUP)DN -0.654

Standardized Within-Group Residuals:

| Min         | Q1          | Med         | Q3         | Max        |
|-------------|-------------|-------------|------------|------------|
| -1.20815645 | -0.71751485 | -0.06598957 | 0.43911221 | 2.87451011 |

Number of Observations: 25

Number of Groups: 9

## Adipose tissue Ccl7 mRNA

- Log transformed outcome

```
lme(log(MEASUREMENTS)~as.factor(GROUP),na.action=na.exclude,random=~1|CAGE)
```

Linear mixed-effects model fit by REML

```
      AIC      BIC    logLik
89.56963 94.1116 -40.78481
```

Random effects:

```
Formula: ~1 | CAGE
```

```
(Intercept) Residual
```

```
StdDev:    0.5189745 1.188207
```

Fixed effects: log(MEASUREMENTS) ~ as.factor(GROUP)

```
              Value Std.Error DF   t-value p-value
(Intercept)    0.4811997 0.3874108 15   1.242091  0.2333
as.factor(GROUP)DN -0.7951036 0.4868322 15  -1.633219  0.1232
```

Correlation:

```
(Intr)
```

```
as.factor(GROUP)DN -0.646
```

Standardized Within-Group Residuals:

```
      Min      Q1      Med      Q3      Max
-2.45429421 -0.68462015  0.04534429  0.52957325  1.76155561
```

Number of Observations: 25

Number of Groups: 9

## Atherosclerosis - Whole aorta

lme(MEASUREMENTS~as.factor(GROUP),na.action=na.exclude,random=~1|CAGE)

Linear mixed-effects model fit by REML

| AIC      | BIC      | logLik   |
|----------|----------|----------|
| 137.3486 | 143.3346 | -64.6743 |

Random effects:

Formula: ~1 | CAGE

(Intercept) Residual

StdDev: 0.8535712 1.391928

Fixed effects: MEASUREMENTS ~ as.factor(GROUP)

|                    | Value     | Std.Error | DF | t-value   | p-value |
|--------------------|-----------|-----------|----|-----------|---------|
| (Intercept)        | 3.429986  | 0.4018913 | 21 | 8.534611  | 0.0000  |
| as.factor(GROUP)DN | -0.793874 | 0.4975658 | 21 | -1.595516 | 0.1255  |

Correlation:

(Intr)

as.factor(GROUP)DN -0.546

Standardized Within-Group Residuals:

| Min        | Q1         | Med       | Q3        | Max       |
|------------|------------|-----------|-----------|-----------|
| -1.6088751 | -0.5122920 | 0.0443579 | 0.4559438 | 1.7203455 |

Number of Observations: 35

Number of Groups: 13

## Atherosclerosis - Aortic arch

lme(MEASUREMENTS~as.factor(GROUP),na.action=na.exclude,random=~1|CAGE)

Linear mixed-effects model fit by REML

| AIC      | BIC      | logLik    |
|----------|----------|-----------|
| 176.4626 | 182.4486 | -84.23128 |

Random effects:

Formula: ~1 | CAGE

(Intercept) Residual

StdDev: 1.84959 2.407985

Fixed effects: MEASUREMENTS ~ as.factor(GROUP)

|                    | Value     | Std.Error | DF | t-value   | p-value |
|--------------------|-----------|-----------|----|-----------|---------|
| (Intercept)        | 6.882241  | 0.7625181 | 21 | 9.025675  | 0.0000  |
| as.factor(GROUP)DN | -0.626173 | 0.8723517 | 21 | -0.717799 | 0.4808  |

Correlation:

(Intr)

as.factor(GROUP)DN -0.5

Standardized Within-Group Residuals:

| Min         | Q1          | Med         | Q3         | Max        |
|-------------|-------------|-------------|------------|------------|
| -1.72605497 | -0.39237228 | -0.04790167 | 0.56550442 | 1.93328981 |

Number of Observations: 35

Number of Groups: 13



## Atherosclerosis - Aortic Conduit

- Separate variance for each cage

```
lme(MEASUREMENTS~as.factor(GROUP),na.action=na.exclude,random=~1|CAGE,weights=varIdent(form=~1|CAGE))
```

Linear mixed-effects model fit by REML

```
      AIC      BIC    logLik
103.0166 126.9607 -35.50829
```

Random effects:

```
Formula: ~1 | CAGE
```

```
(Intercept) Residual
```

```
StdDev:    0.6754179 0.1922569
```

Variance function:

```
Structure: Different standard deviations per stratum
```

```
Formula: ~1 | CAGE
```

```
Parameter estimates:
```

```
      1      2      4      5      6      7      8      9     10
11      12     13     14
1.0000000 4.8726024 1.7466658 2.4423519 1.0661179 2.2941552 5.9888016 0.7913750 7.2411049
0.1830296 7.7441739 2.3529391 0.8158550
```

Fixed effects: MEASUREMENTS ~ as.factor(GROUP)

```
              Value Std.Error DF   t-value p-value
(Intercept)    1.1660331 0.211175552 21   5.506506  0.0000
as.factor(GROUP)DN -0.0936825 0.04138925 21  -2.263451  0.0343
```

Correlation:

```
(Intr)
as.factor(GROUP)DN -0.077
```

Standardized Within-Group Residuals:

```
      Min      Q1      Med      Q3      Max
-1.40383817 -0.76777524 -0.06686094  0.79237245  1.54262569
```

Number of Observations: 35

Number of Groups: 13

## Weight Gain Week 6

- Separate variance for each cage

```
lme(MEASUREMENTS~as.factor(GROUP),na.action=na.exclude,random=~1|CAGE,weights=varIdent(form=~1|CAGE))
```

Linear mixed-effects model fit by REML

```
      AIC      BIC    logLik
226.9532 243.7991 -100.4766
```

Random effects:

```
Formula: ~1 | CAGE
```

```
(Intercept) Residual
```

```
StdDev:    10.42275 6.598615
```

Variance function:

```
Structure: Different standard deviations per stratum
```

```
Formula: ~1 | CAGE
```

```
Parameter estimates:
```

```
      5      6      7      8      9      10      11      12      13
14
1.0000000 0.1034838 1.5789848 1.7823585 2.9816233 1.2284970 1.2961055 0.6203762 0.9423738
0.4006431
```

```
Fixed effects: MEASUREMENTS ~ as.factor(GROUP)
```

```
              Value Std.Error DF   t-value p-value
(Intercept)    40.30330   3.661662 18  11.00683     0
as.factor(GROUP)DN -12.82013   0.804876 18 -15.92808     0
```

```
Correlation:
```

```
              (Intr)
as.factor(GROUP)DN -0.092
```

Standardized Within-Group Residuals:

```
      Min      Q1      Med      Q3      Max
-1.281830598 -0.695807847 -0.006646045  0.768642613  1.619162874
```

Number of Observations: 29

Number of Groups: 10

## Weight Gain Week 12

- Separate variance for each cage

```
lme(MEASUREMENTS~as.factor(GROUP),na.action=na.exclude,random=~1|CAGE,weights=varIdent(form=~1|CAGE))
```

Linear mixed-effects model fit by REML

```
      AIC      BIC    logLik
262.3421 279.188 -118.1711
```

Random effects:

```
Formula: ~1 | CAGE
```

```
(Intercept) Residual
```

```
StdDev:    19.09569 1.840794
```

Variance function:

```
Structure: Different standard deviations per stratum
```

```
Formula: ~1 | CAGE
```

```
Parameter estimates:
```

```
      5      6      7      8      9      10      11      12      13
14
1.000000 4.844124 11.841168 13.314933 11.952929 7.701824 8.327383 3.637733 15.390009
5.920469
```

```
Fixed effects: MEASUREMENTS ~ as.factor(GROUP)
```

```
              Value Std.Error DF   t-value p-value
(Intercept)    80.74312  6.849613 18  11.78798     0
as.factor(GROUP)DN -25.93712  2.048303 18 -12.66274     0
```

```
Correlation:
```

```
              (Intr)
as.factor(GROUP)DN -0.129
```

```
Standardized Within-Group Residuals:
```

```
      Min      Q1      Med      Q3      Max
-1.4987695 -0.7199205 0.1069572 0.6272421 1.6227194
```

```
Number of Observations: 29
```

```
Number of Groups: 10
```

## Adipocyte size

- Separate variance for each cage

```
lme(MEASUREMENTS~as.factor(GROUP),na.action=na.exclude,random=~1|CAGE,weights=varIdent(form=~1|CAGE))
```

Linear mixed-effects model fit by REML

```
      AIC      BIC  logLik
417.096 431.7225 -196.548
```

Random effects:

```
Formula: ~1 | CAGE
```

```
(Intercept) Residual
```

```
StdDev:    205.8004 553.1374
```

Variance function:

```
Structure: Different standard deviations per stratum
```

```
Formula: ~1 | CAGE
```

```
Parameter estimates:
```

```
      4      5      6      7      8      9      10      11
12
1.00000000 0.07704862 0.33401133 1.61261520 2.78493998 0.61984231 1.71281120 0.27927668
2.60268312
```

Fixed effects: MEASUREMENTS ~ as.factor(GROUP)

```
              Value Std.Error DF   t-value p-value
(Intercept)    4526.546 109.96148 17  41.16483    0
as.factor(GROUP)DN -508.252  48.61002 17 -10.45571    0
```

Correlation:

```
(Intr)
as.factor(GROUP)DN -0.218
```

Standardized Within-Group Residuals:

```
      Min      Q1      Med      Q3      Max
-1.96562200 -0.58563257 0.07957057 0.64274551 1.64166232
```

Number of Observations: 27

Number of Groups: 9

## Liver Steatosis

lme(MEASUREMENTS~as.factor(GROUP),na.action=na.exclude,random=~1|CAGE)

Linear mixed-effects model fit by REML

| AIC      | BIC      | logLik    |
|----------|----------|-----------|
| 170.5876 | 175.1296 | -81.29379 |

Random effects:

Formula: ~1 | CAGE

(Intercept) Residual

StdDev: 3.769916 6.706968

Fixed effects: MEASUREMENTS ~ as.factor(GROUP)

|                    | Value     | Std.Error | DF | t-value  | p-value |
|--------------------|-----------|-----------|----|----------|---------|
| (Intercept)        | 27.225011 | 2.444700  | 16 | 11.13634 | 0.0000  |
| as.factor(GROUP)DN | -4.896344 | 2.738187  | 16 | -1.78817 | 0.0927  |

Correlation:

(Intr)

as.factor(GROUP)DN -0.629

Standardized Within-Group Residuals:

| Min        | Q1         | Med       | Q3        | Max       |
|------------|------------|-----------|-----------|-----------|
| -2.5428596 | -0.3756805 | 0.2148794 | 0.5911253 | 1.2486900 |

Number of Observations: 25

Number of Groups: 8

## Liver Srebplc mRNA

- Separate variance for each cage

```
lme(MEASUREMENTS~as.factor(GROUP),na.action=na.exclude,random=~1|CAGE,weights=varIdent(form=~1|CAGE))
```

Linear mixed-effects model fit by REML

```
      AIC      BIC    logLik
128.8651 140.8665 -53.43253
```

Random effects:

```
Formula: ~1 | CAGE
```

```
(Intercept) Residual
```

```
StdDev:    0.5253005 3.495393
```

Variance function:

```
Structure: Different standard deviations per stratum
```

```
Formula: ~1 | CAGE
```

```
Parameter estimates:
```

```
      4      5      6      7      8      10      11      12
1.0000000 0.2624571 0.5421273 0.1554060 1.1049000 0.4750143 2.5899755 1.1895210
```

```
Fixed effects: MEASUREMENTS ~ as.factor(GROUP)
```

```
              Value Std.Error DF   t-value p-value
(Intercept)      9.298797 0.4697197 15 19.796480  0.000
as.factor(GROUP)DN -1.874583 0.4590505 15 -4.083609  0.001
```

```
Correlation:
```

```
              (Intr)
as.factor(GROUP)DN -0.554
```

Standardized Within-Group Residuals:

```
      Min      Q1      Med      Q3      Max
-1.3887363 -0.4700683  0.2445098  0.8079815  1.8443333
```

Number of Observations: 24

Number of Groups: 8

## Liver Acaca mRNA

lme(MEASUREMENTS~as.factor(GROUP),na.action=na.exclude,random=~1|CAGE)

Linear mixed-effects model fit by REML

| AIC      | BIC      | logLik    |
|----------|----------|-----------|
| 136.9992 | 141.8747 | -64.49961 |

Random effects:

Formula: ~1 | CAGE

(Intercept) Residual

StdDev: 2.417757 2.254051

Fixed effects: MEASUREMENTS ~ as.factor(GROUP)

|                    | Value     | Std.Error | DF | t-value   | p-value |
|--------------------|-----------|-----------|----|-----------|---------|
| (Intercept)        | 7.195587  | 0.9827833 | 16 | 7.321641  | 0.0000  |
| as.factor(GROUP)DN | -1.988653 | 0.9206586 | 16 | -2.160033 | 0.0463  |

Correlation:

(Intr)

as.factor(GROUP)DN -0.423

Standardized Within-Group Residuals:

| Min        | Q1         | Med       | Q3        | Max       |
|------------|------------|-----------|-----------|-----------|
| -1.5057243 | -0.6889085 | 0.1725828 | 0.4741543 | 1.8815818 |

Number of Observations: 27

Number of Groups: 10

## Liver Fasn mRNA

lme(MEASUREMENTS~as.factor(GROUP),na.action=na.exclude,random=~1|CAGE)

Linear mixed-effects model fit by REML

| AIC      | BIC      | logLik    |
|----------|----------|-----------|
| 79.85878 | 84.73428 | -35.92939 |

Random effects:

Formula: ~1 | CAGE

(Intercept) Residual

StdDev: 0.3574923 0.858634

Fixed effects: MEASUREMENTS ~ as.factor(GROUP)

|                    | Value      | Std.Error | DF | t-value   | p-value |
|--------------------|------------|-----------|----|-----------|---------|
| (Intercept)        | 2.0619022  | 0.2579059 | 16 | 7.994786  | 0.0000  |
| as.factor(GROUP)DN | -0.6705682 | 0.3379362 | 16 | -1.984304 | 0.0646  |

Correlation:

(Intr)

as.factor(GROUP)DN -0.618

Standardized Within-Group Residuals:

| Min        | Q1         | Med        | Q3        | Max       |
|------------|------------|------------|-----------|-----------|
| -1.4592421 | -0.7099803 | -0.2408227 | 0.3804016 | 2.2347082 |

Number of Observations: 27

Number of Groups: 10



## Liver Scd1 mRNA

lme(MEASUREMENTS~as.factor(GROUP),na.action=na.exclude,random=~1|CAGE)

Linear mixed-effects model fit by REML

| AIC      | BIC      | logLik    |
|----------|----------|-----------|
| 117.8604 | 122.7359 | -54.93018 |

Random effects:

Formula: ~1 | CAGE

(Intercept) Residual

StdDev: 0.688461 1.857884

Fixed effects: MEASUREMENTS ~ as.factor(GROUP)

|                    | Value     | Std.Error | DF | t-value   | p-value |
|--------------------|-----------|-----------|----|-----------|---------|
| (Intercept)        | 3.924979  | 0.5460840 | 16 | 7.187501  | 0.0000  |
| as.factor(GROUP)DN | -1.067380 | 0.7286659 | 16 | -1.464841 | 0.1623  |

Correlation:

(Intr)

as.factor(GROUP)DN -0.631

Standardized Within-Group Residuals:

| Min        | Q1         | Med        | Q3        | Max       |
|------------|------------|------------|-----------|-----------|
| -1.4126724 | -0.4593962 | -0.1350479 | 0.4058632 | 2.3005514 |

Number of Observations: 27

Number of Groups: 10

## CHOLESTEROL

lme(MEASUREMENTS~as.factor(GROUP),na.action=na.exclude,random=~1|CAGE)

Linear mixed-effects model fit by REML

| AIC      | BIC     | logLik    |
|----------|---------|-----------|
| 123.4102 | 127.188 | -57.70511 |

Random effects:

Formula: ~1 | CAGE

(Intercept) Residual

StdDev: 0.6351555 4.421418

Fixed effects: MEASUREMENTS ~ as.factor(GROUP)

|                    | Value     | Std.Error | DF | t-value   | p-value |
|--------------------|-----------|-----------|----|-----------|---------|
| (Intercept)        | 22.517433 | 1.583070  | 12 | 14.223904 | 0.000   |
| as.factor(GROUP)DN | -1.466909 | 1.989032  | 12 | -0.737499 | 0.475   |

Correlation:

(Intr)

as.factor(GROUP)DN -0.779

Standardized Within-Group Residuals:

| Min         | Q1          | Med        | Q3         | Max        |
|-------------|-------------|------------|------------|------------|
| -2.86810542 | -0.50231786 | 0.08201051 | 0.46205784 | 2.25844724 |

Number of Observations: 21

Number of Groups: 8

## HDL

```
lme(MEASUREMENTS~as.factor(GROUP),na.action=na.exclude,random=~1|CAGE)
```

Linear mixed-effects model fit by REML

|  | AIC       | BIC       | logLik   |
|--|-----------|-----------|----------|
|  | -28.40044 | -24.83895 | 18.20022 |

Random effects:

Formula: ~1 | CAGE

|  | (Intercept) | Residual |
|--|-------------|----------|
|--|-------------|----------|

StdDev: 0.03013001 0.07249113

Fixed effects: MEASUREMENTS ~ as.factor(GROUP)

|                    | Value      | Std.Error  | DF | t-value   | p-value |
|--------------------|------------|------------|----|-----------|---------|
| (Intercept)        | 0.3535842  | 0.02813218 | 11 | 12.568674 | 0.0000  |
| as.factor(GROUP)DN | -0.0010577 | 0.03332860 | 11 | -0.031736 | 0.9753  |

Correlation:

(Intr)

as.factor(GROUP)DN -0.716

Standardized Within-Group Residuals:

|  | Min        | Q1         | Med        | Q3        | Max       |
|--|------------|------------|------------|-----------|-----------|
|  | -0.8908851 | -0.5403010 | -0.4401045 | 0.5663041 | 1.9694419 |

Number of Observations: 20

Number of Groups: 8

## LDL

lme(MEASUREMENTS~as.factor(GROUP),na.action=na.exclude,random=~1|CAGE)

Linear mixed-effects model fit by REML

|  | AIC      | BIC      | logLik    |
|--|----------|----------|-----------|
|  | 104.6889 | 108.2503 | -48.34443 |

Random effects:

Formula: ~1 | CAGE

(Intercept) Residual

StdDev: 1.638636 2.781935

Fixed effects: MEASUREMENTS ~ as.factor(GROUP)

|                    | Value     | Std.Error | DF | t-value   | p-value |
|--------------------|-----------|-----------|----|-----------|---------|
| (Intercept)        | 21.291422 | 1.163471  | 11 | 18.299918 | 0.0000  |
| as.factor(GROUP)DN | -0.416924 | 1.284565  | 11 | -0.324564 | 0.7516  |

Correlation:

(Intr)

as.factor(GROUP)DN -0.67

Standardized Within-Group Residuals:

|  | Min        | Q1         | Med       | Q3        | Max       |
|--|------------|------------|-----------|-----------|-----------|
|  | -1.4513596 | -0.5360393 | 0.1487976 | 0.4505872 | 2.5088054 |

Number of Observations: 20

Number of Groups: 8

## TRIGLYCERIDES

- No random intercept

```
lm(MEASUREMENTS~as.factor(GROUP),na.action=na.exclude)
```

```
Call:
```

```
lm(formula = MEASUREMENTS ~ as.factor(GROUP),  
    na.action = na.exclude)
```

```
Residuals:
```

```
      Min       1Q   Median       3Q      Max  
-1.2286 -0.3000  0.0000  0.2714  1.3714
```

```
Coefficients:
```

```
              Estimate Std. Error t value Pr(>|t|)  
(Intercept)         2.2000     0.1681  13.088 3.84e-12 ***  
as.factor(GROUP)DN  -0.3714     0.2246  -1.654   0.112  
---  
Signif. codes:  0 '***' 0.001 '**' 0.01 '*' 0.05 '.' 0.1 ' ' 1
```

```
Residual standard error: 0.5575 on 23 degrees of freedom
```

```
(10 observations deleted due to missingness)
```

```
Multiple R-squared:  0.1062,    Adjusted R-squared:  0.06739
```

```
F-statistic: 2.734 on 1 and 23 DF,  p-value: 0.1118
```
